# Supplementary material for: Binding Efficacy and Thermogenic Efficiency of Pungent and Nonpungent Analogs of Capsaicin
Source: MDPI journal article supplement (doi:10.3390/molecules23123198), 2018-12-04

# TRPV1

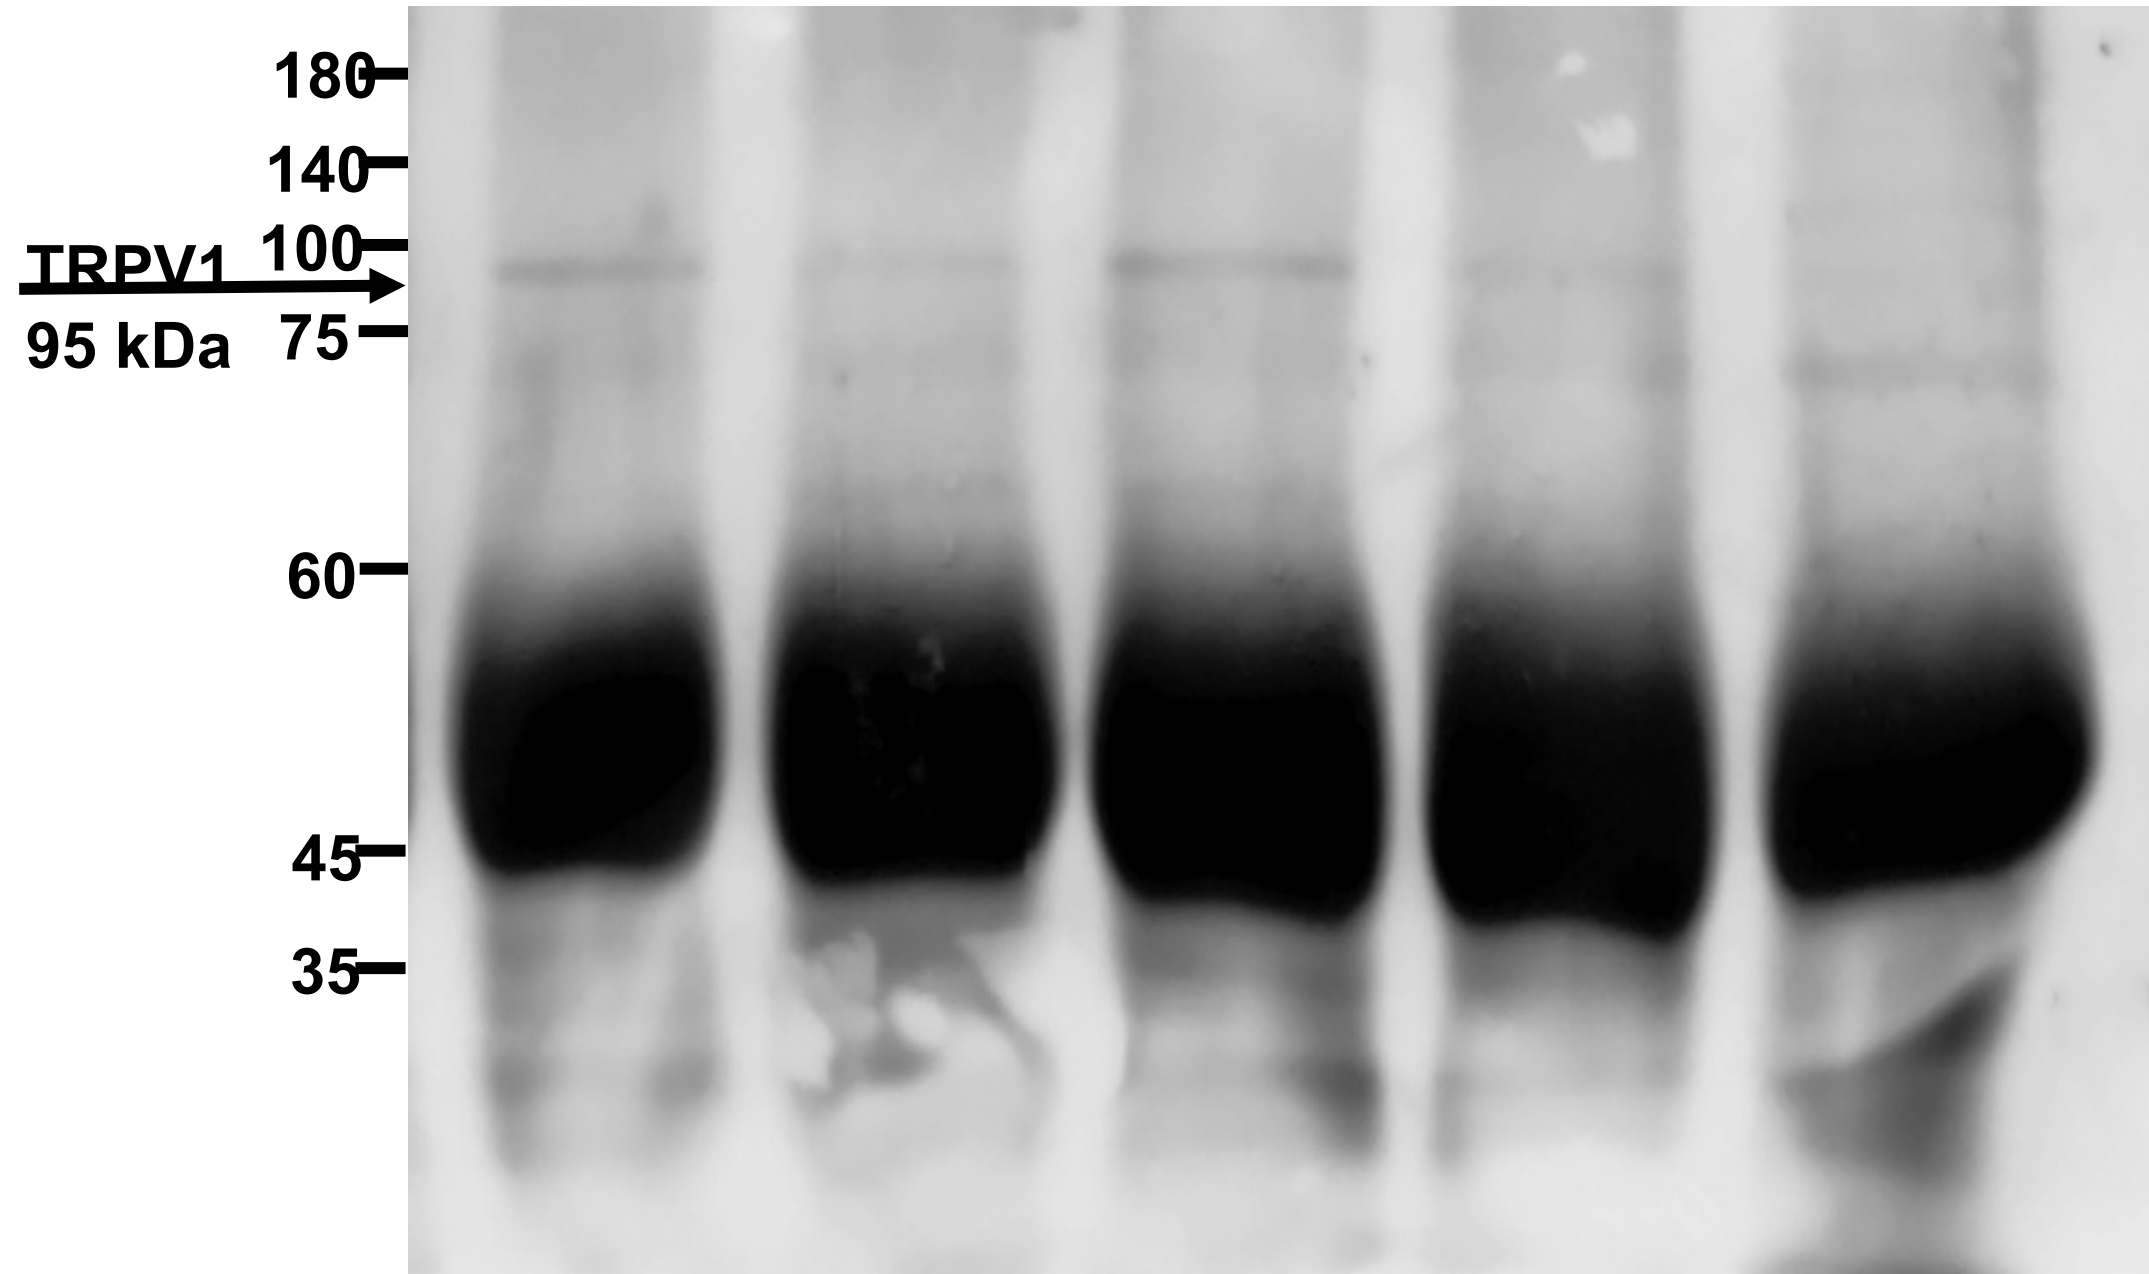

TRPV1

NCD

HFD

HFD +  
CAP

HFD +  
Capsiate

HFD+  
CAP- $\beta$ -Dgluco

18

0

14

0

TRPV1

10

95 kDa

0

7

5

6

0

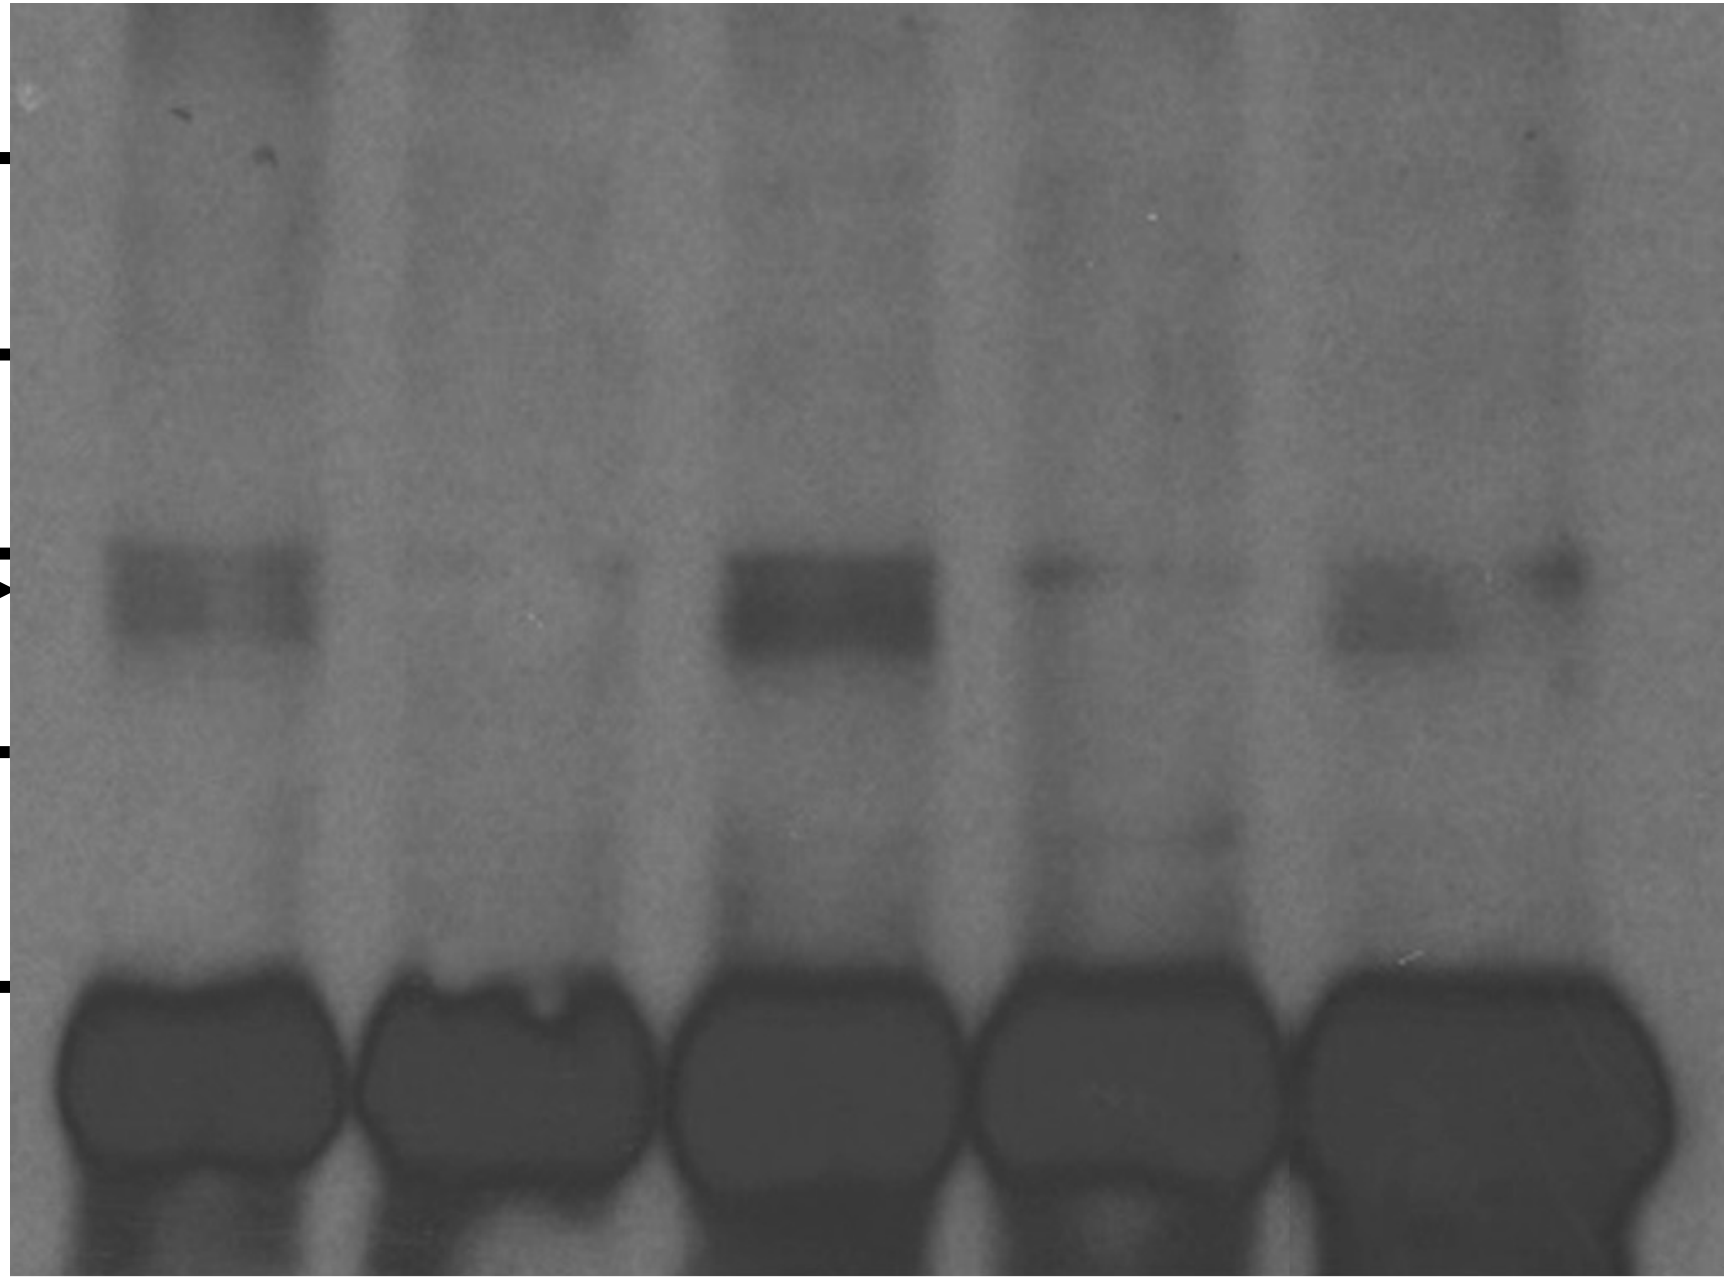

PPAR  $\alpha$

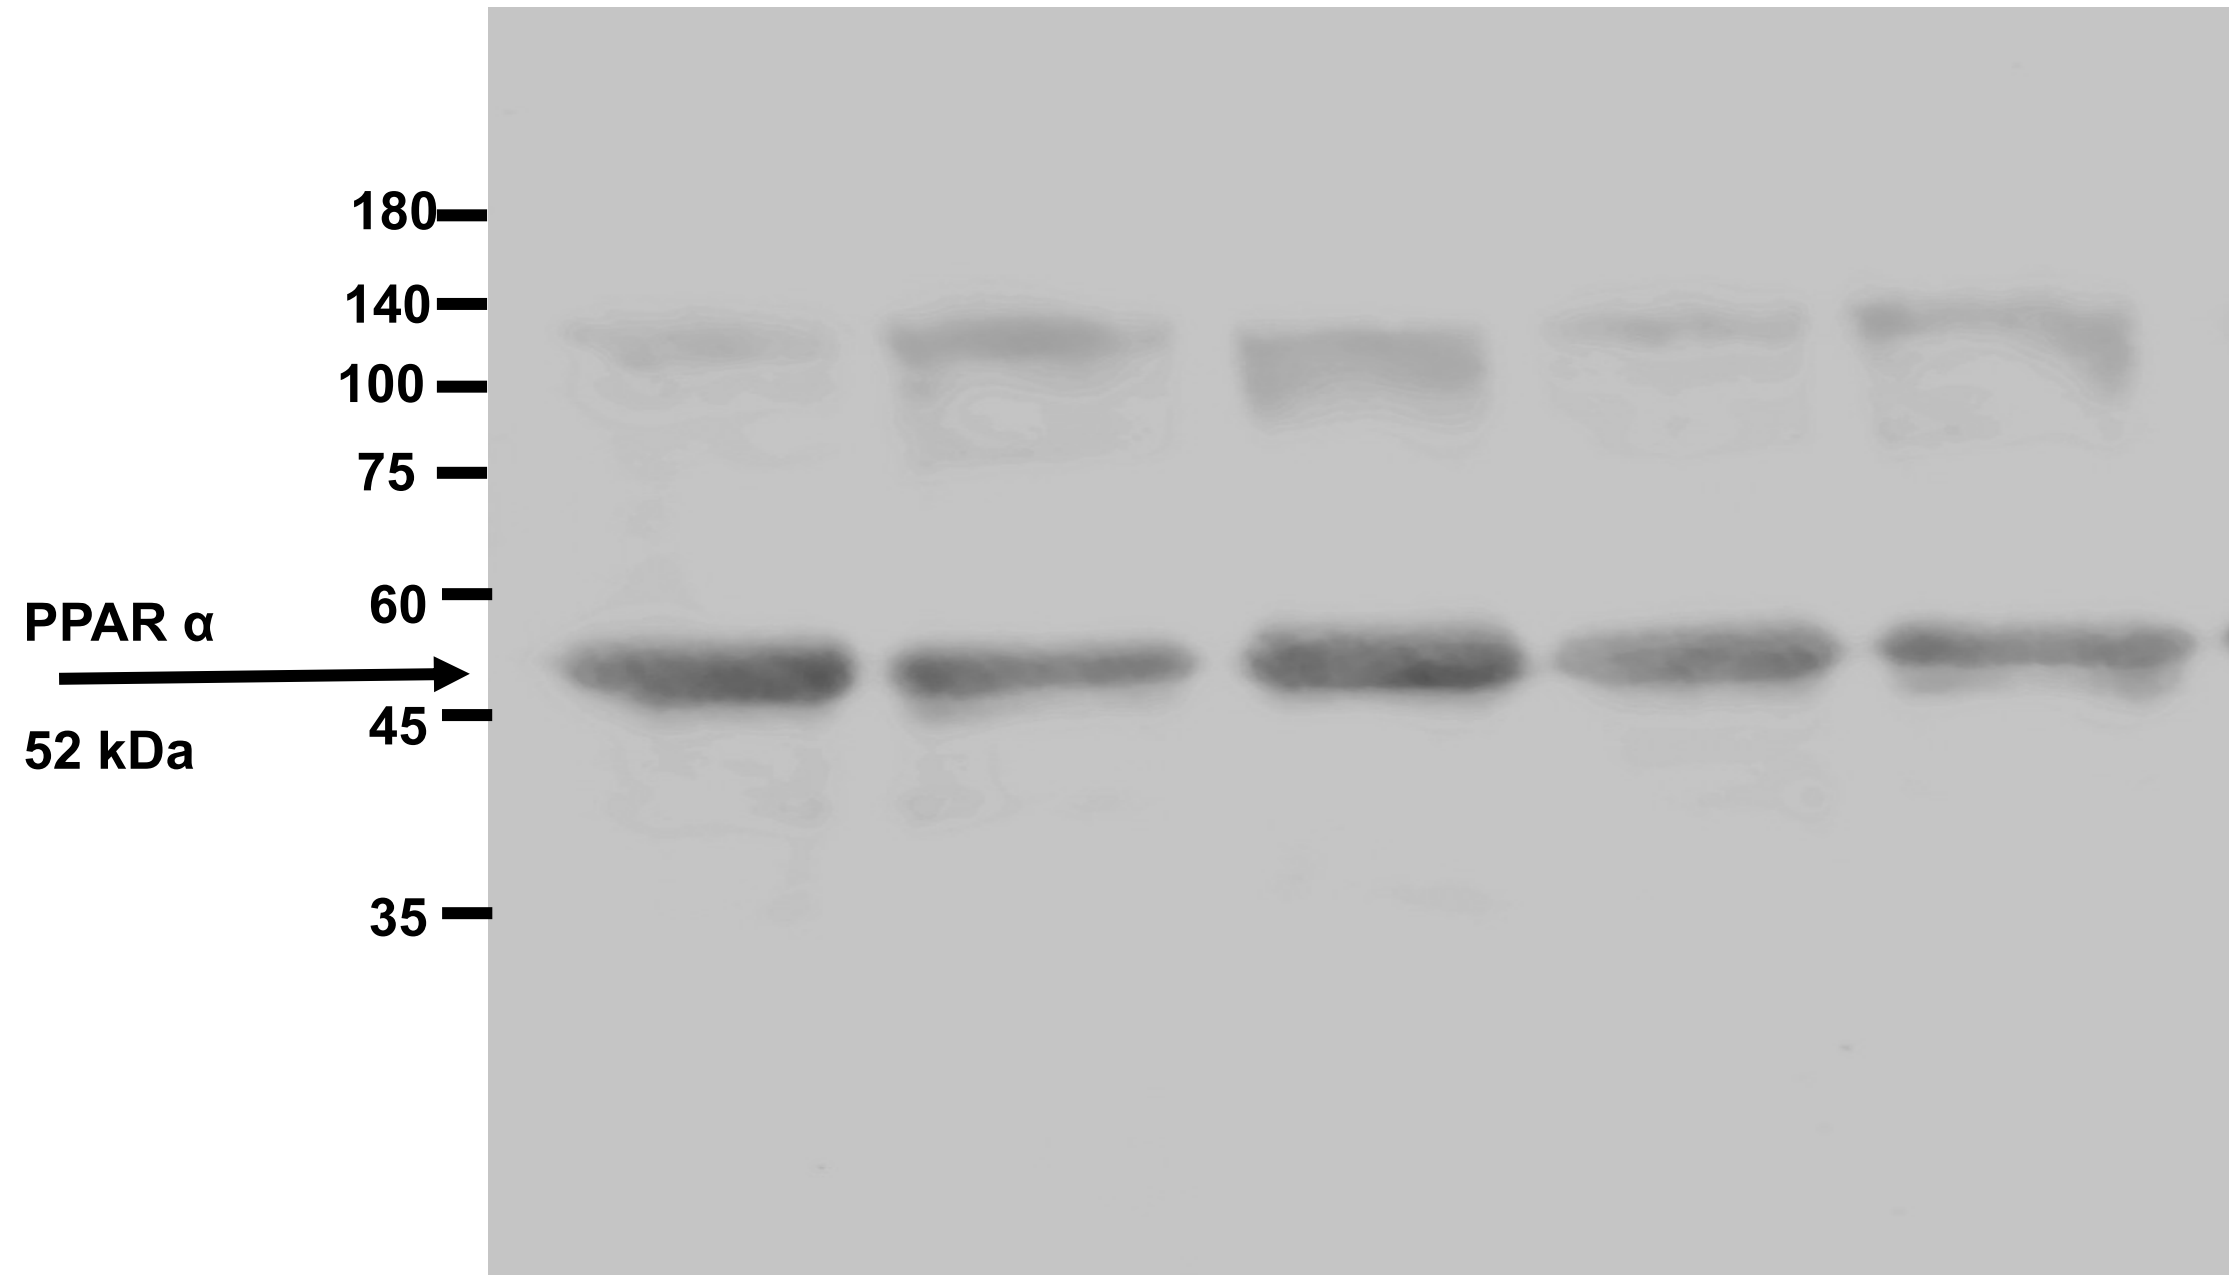

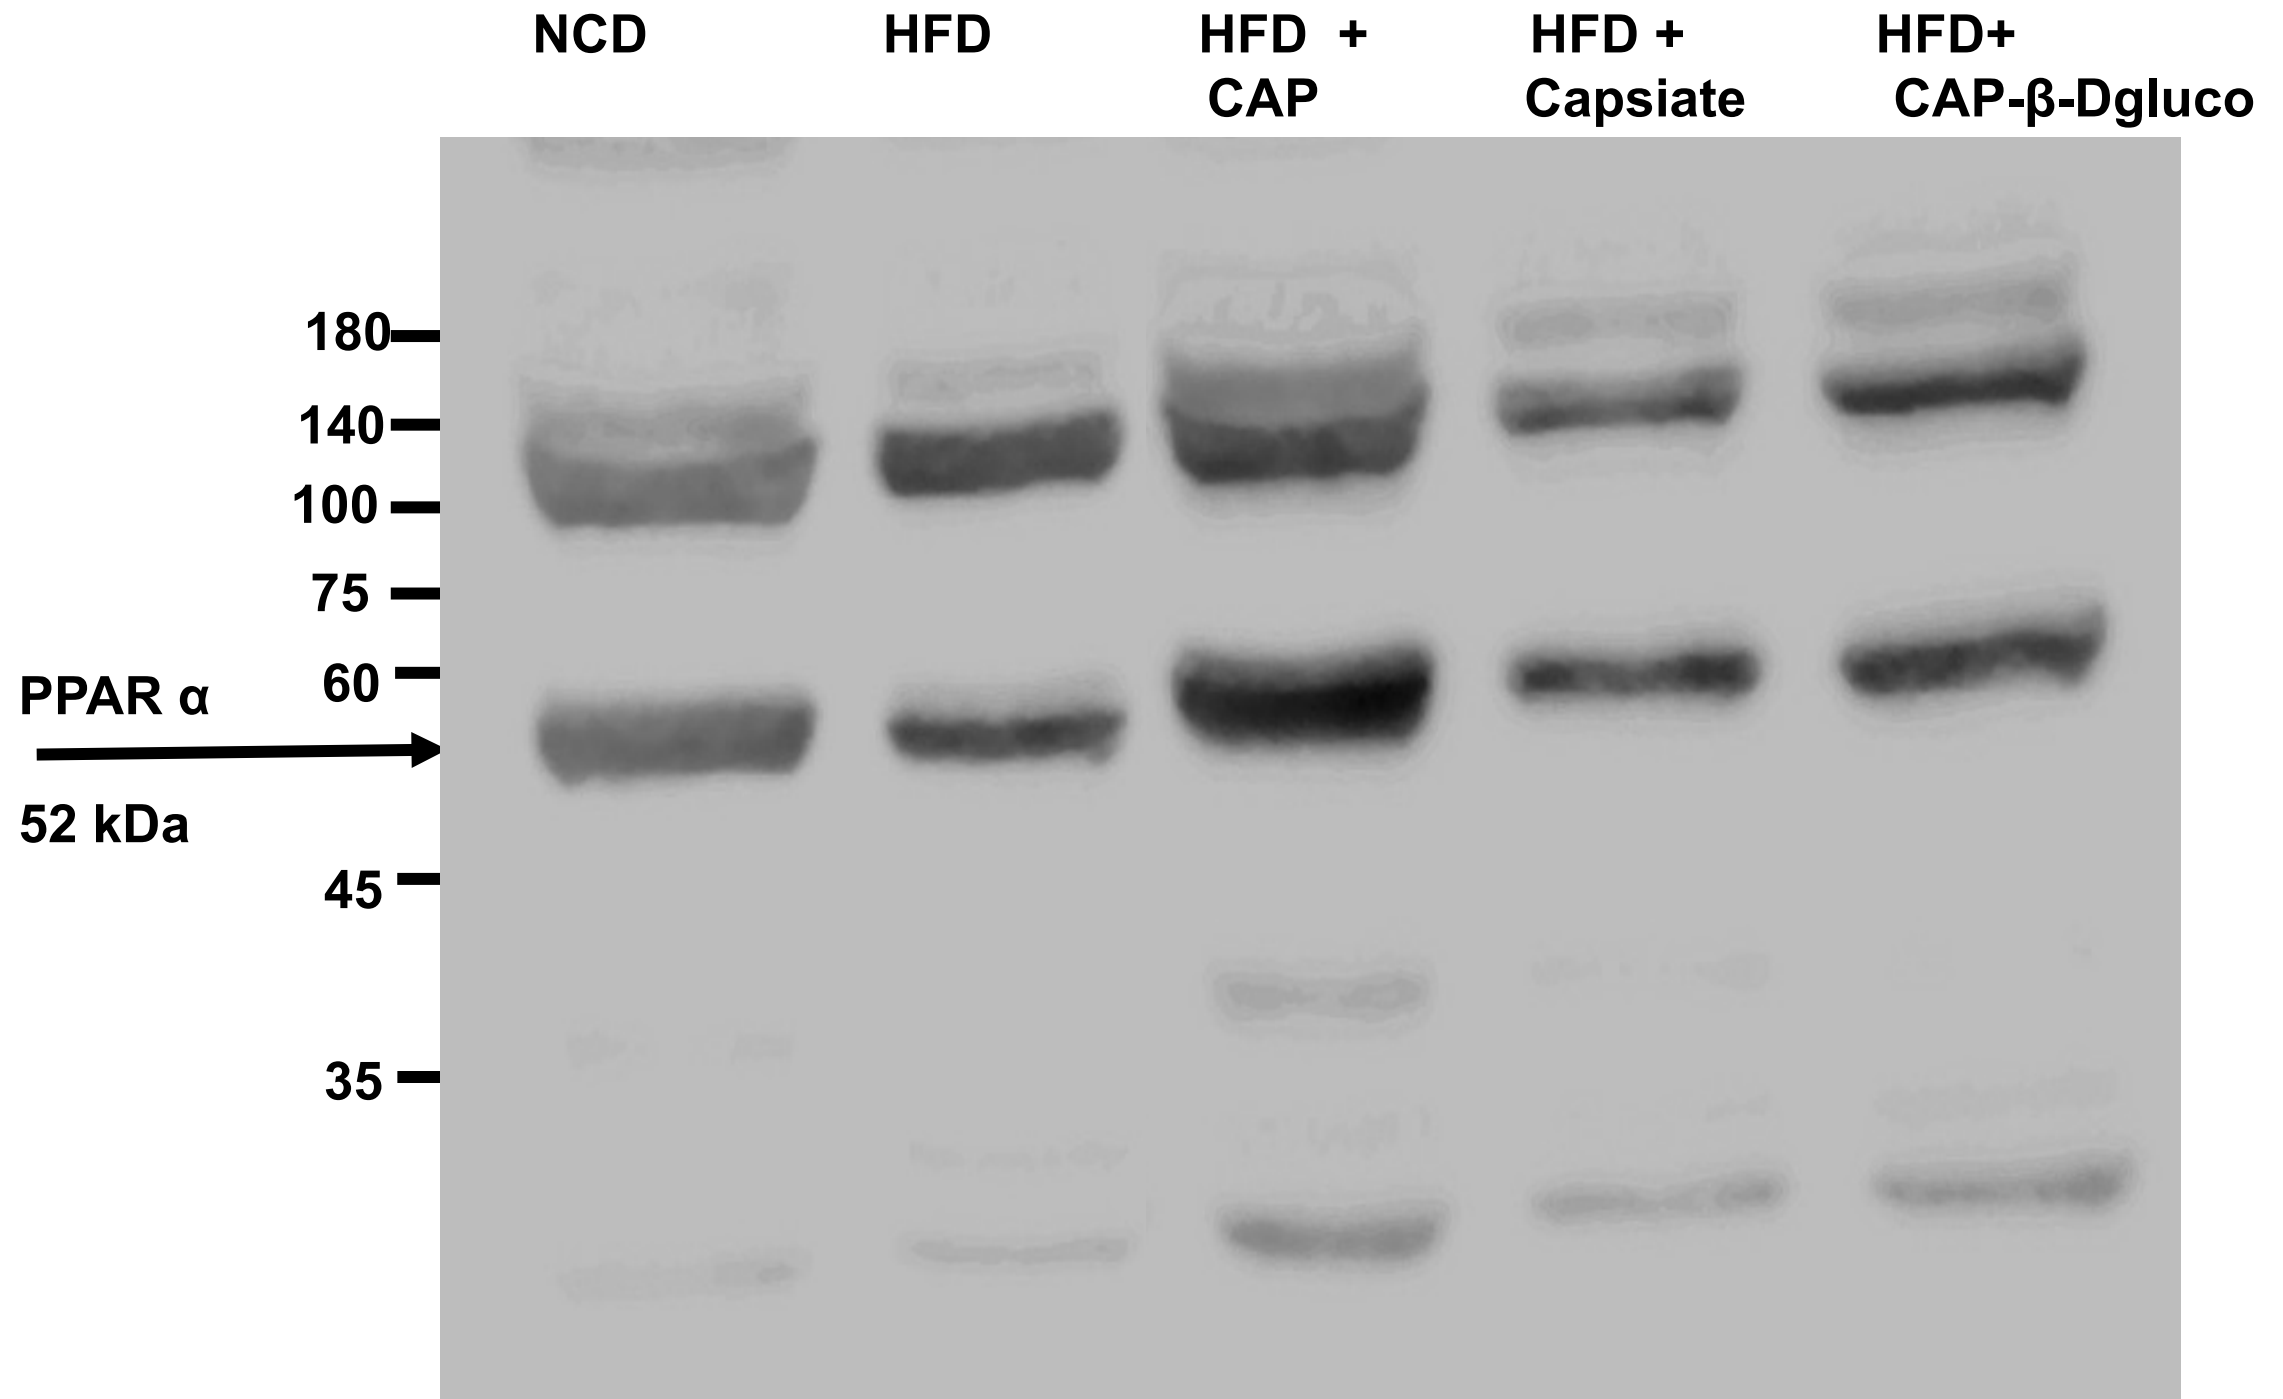

BMP8b

NCD

HFD

HFD +  
CAP

HFD +  
Capsiate

HFD+  
CAP- $\beta$ -Dgluco

180 —

140 —

100 —

75 —

60 —

BMP8b  
45 kDa —  
45 —

35 —

25 —

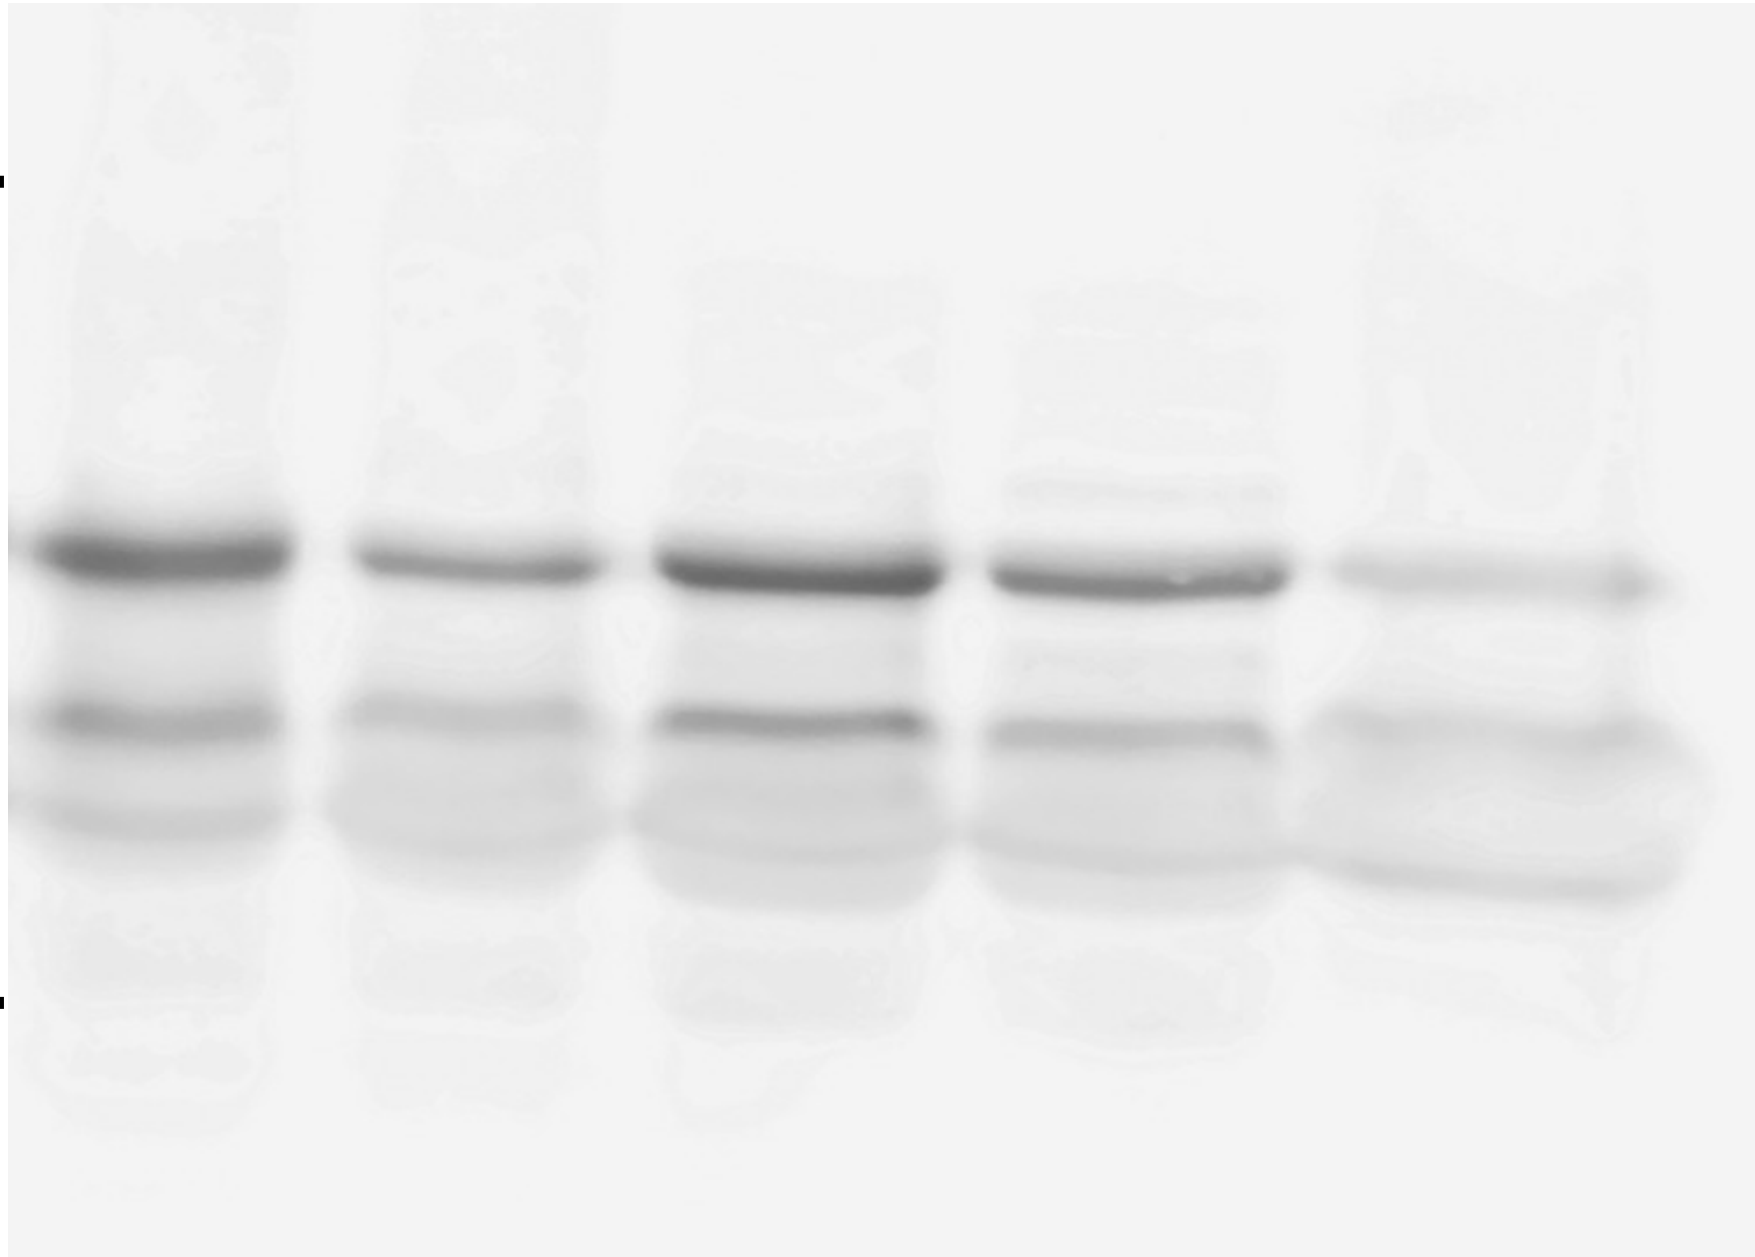

BMP8b

NCD

HFD

HFD +  
CAP

HFD +  
Capsiate

HFD+  
CAP- $\beta$ -Dgluco

180 —

140 —

100 —

75 —

60 —

BMP8b  
45 kDa →  
45 —

35 —

25 —

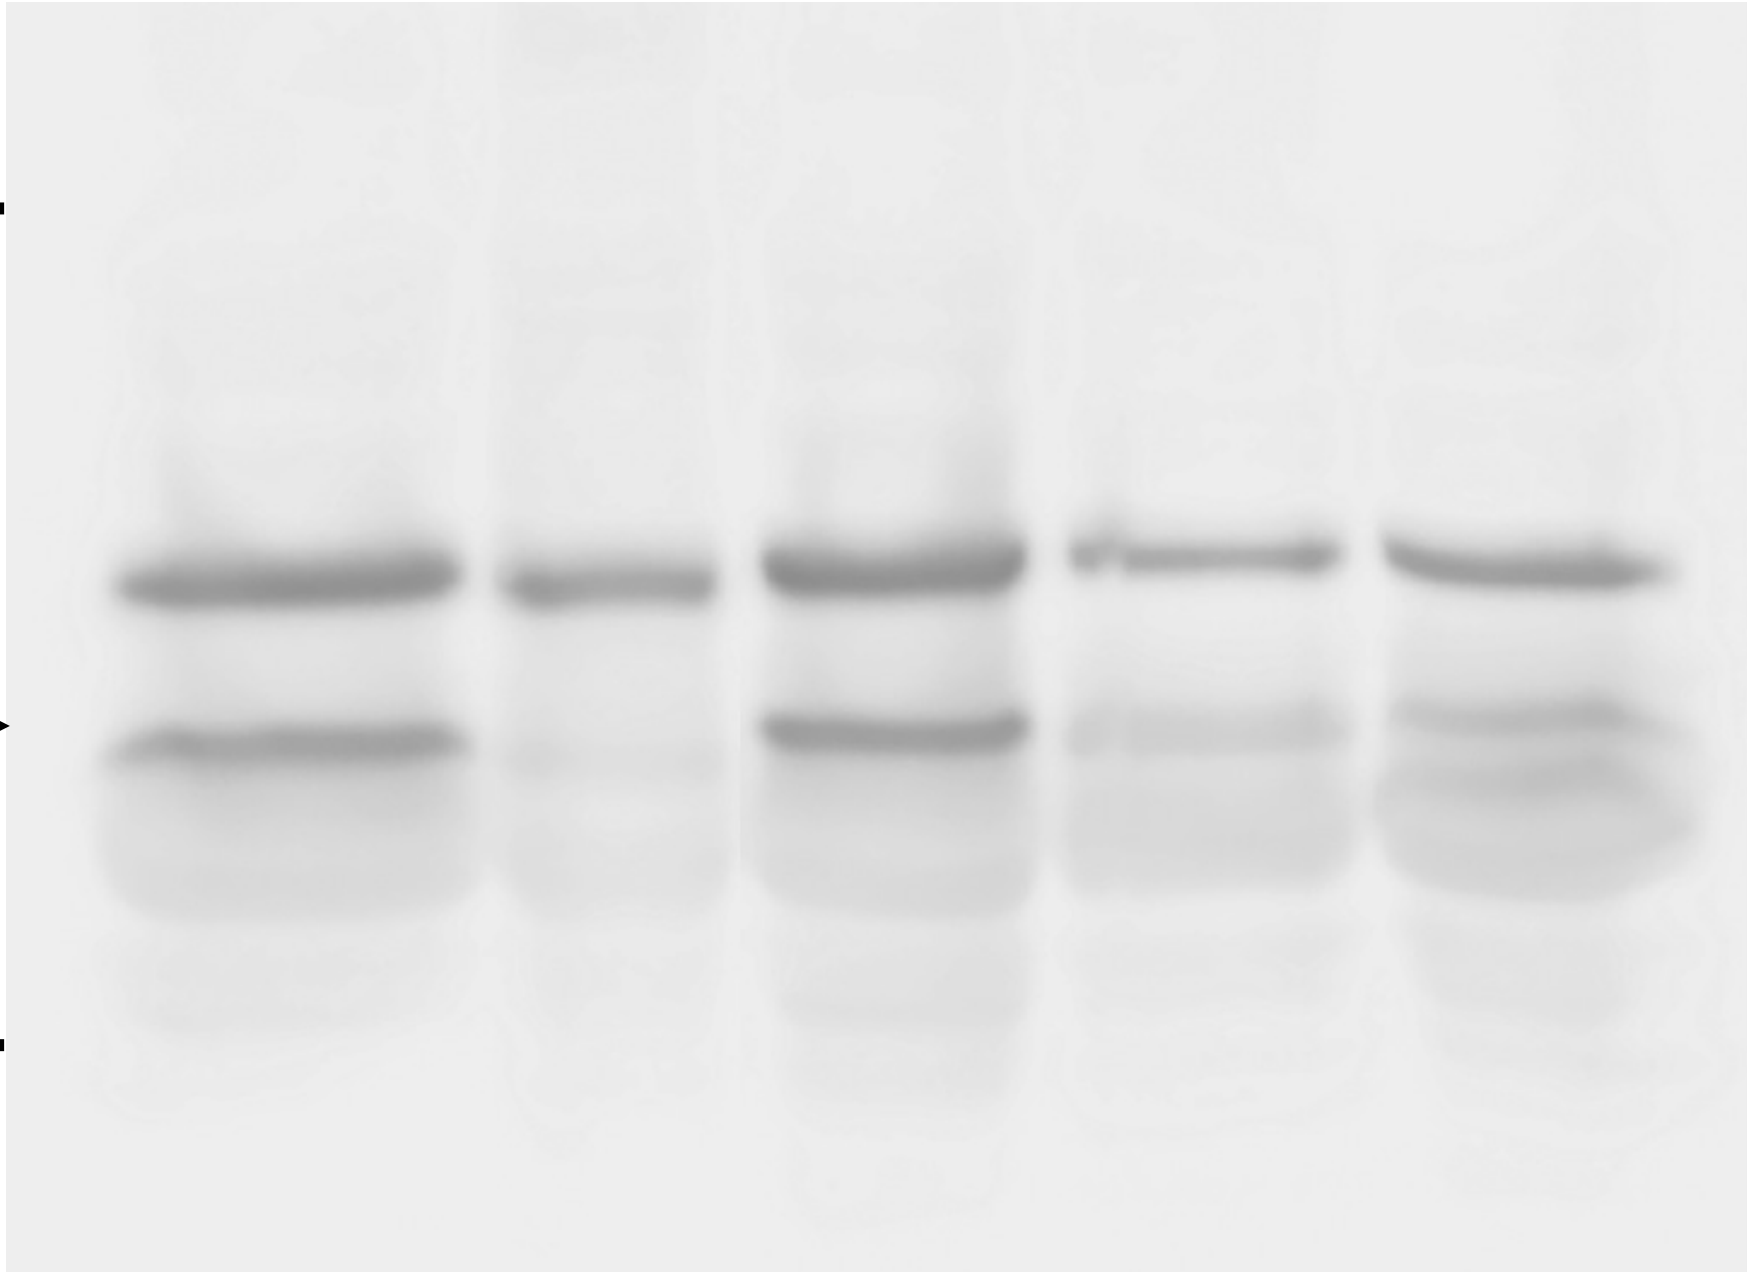

UCP1

NCD

HFD

HFD +  
CAP

HFD +  
Capsiate

HFD+  
CAP- $\beta$ -Dgluco

100—  
75—  
60—  
45—  
35—  
25—

UCP1  
31 kDa

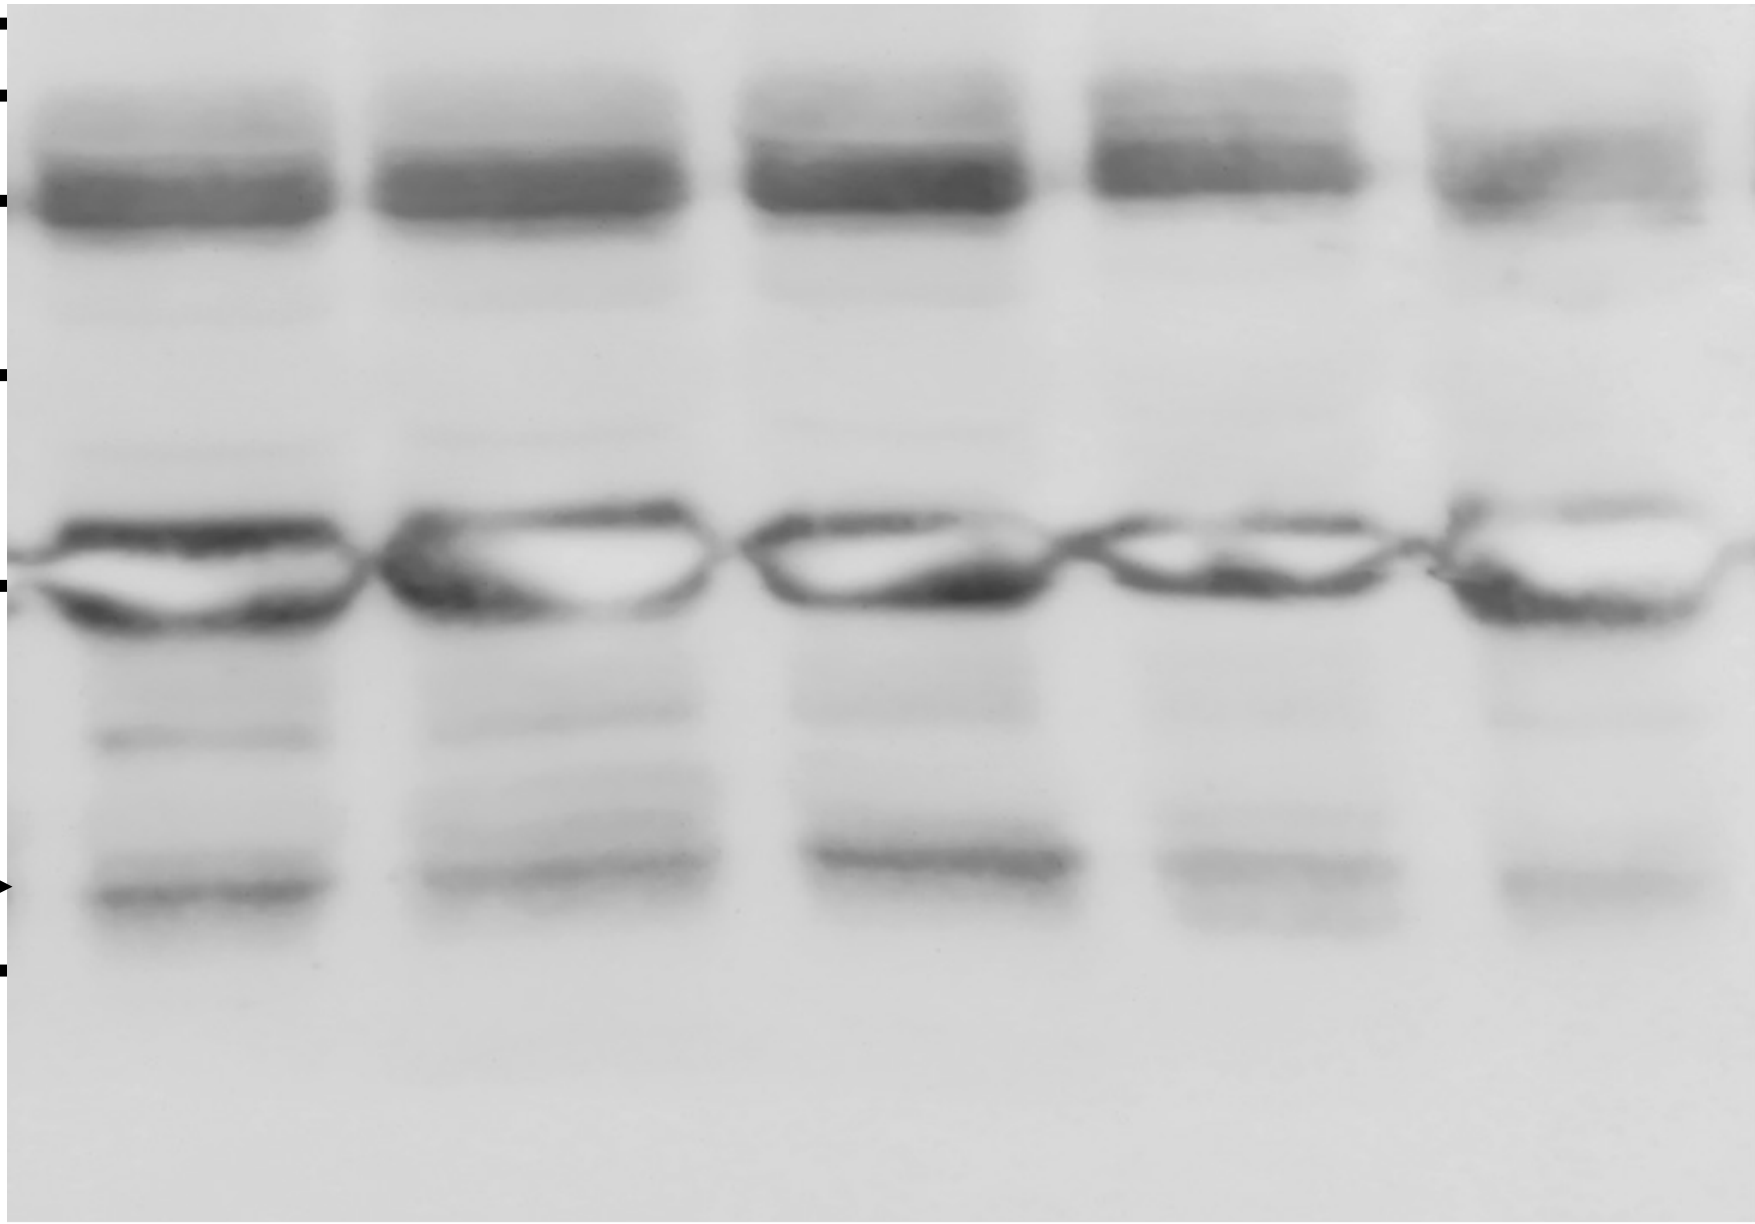

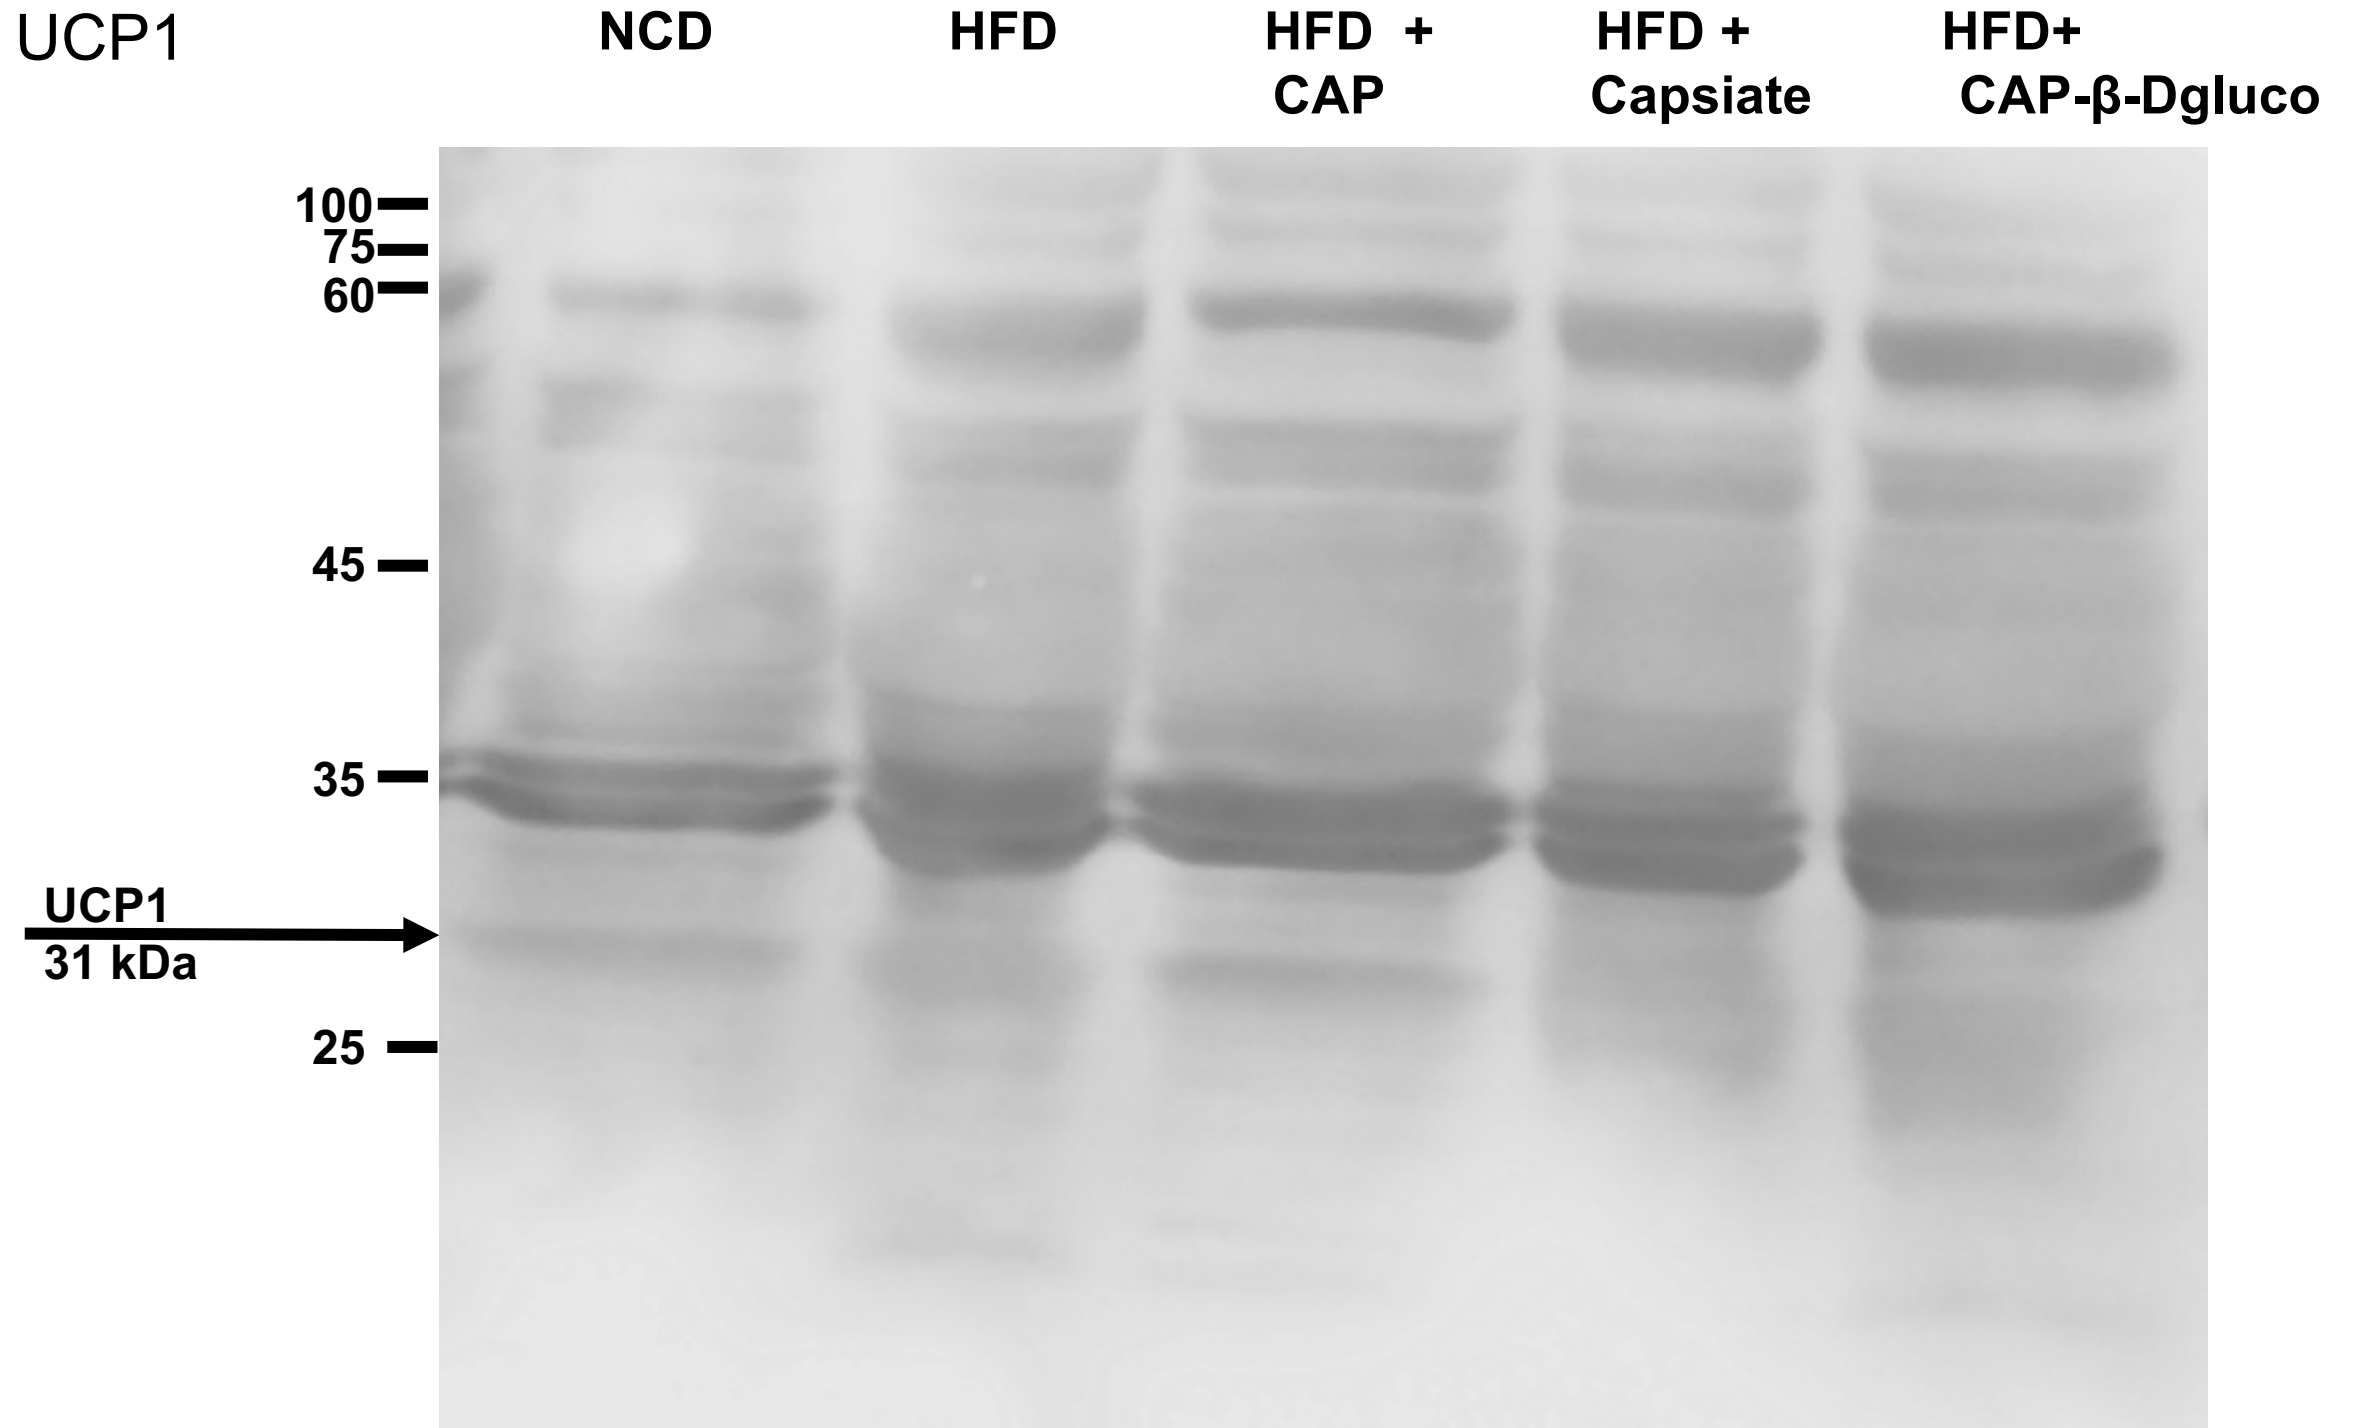



SIRT1

NCD

HFD

HFD +  
CAP

HFD +  
Capsiate

HFD+  
CAP- $\beta$ -Dgluco

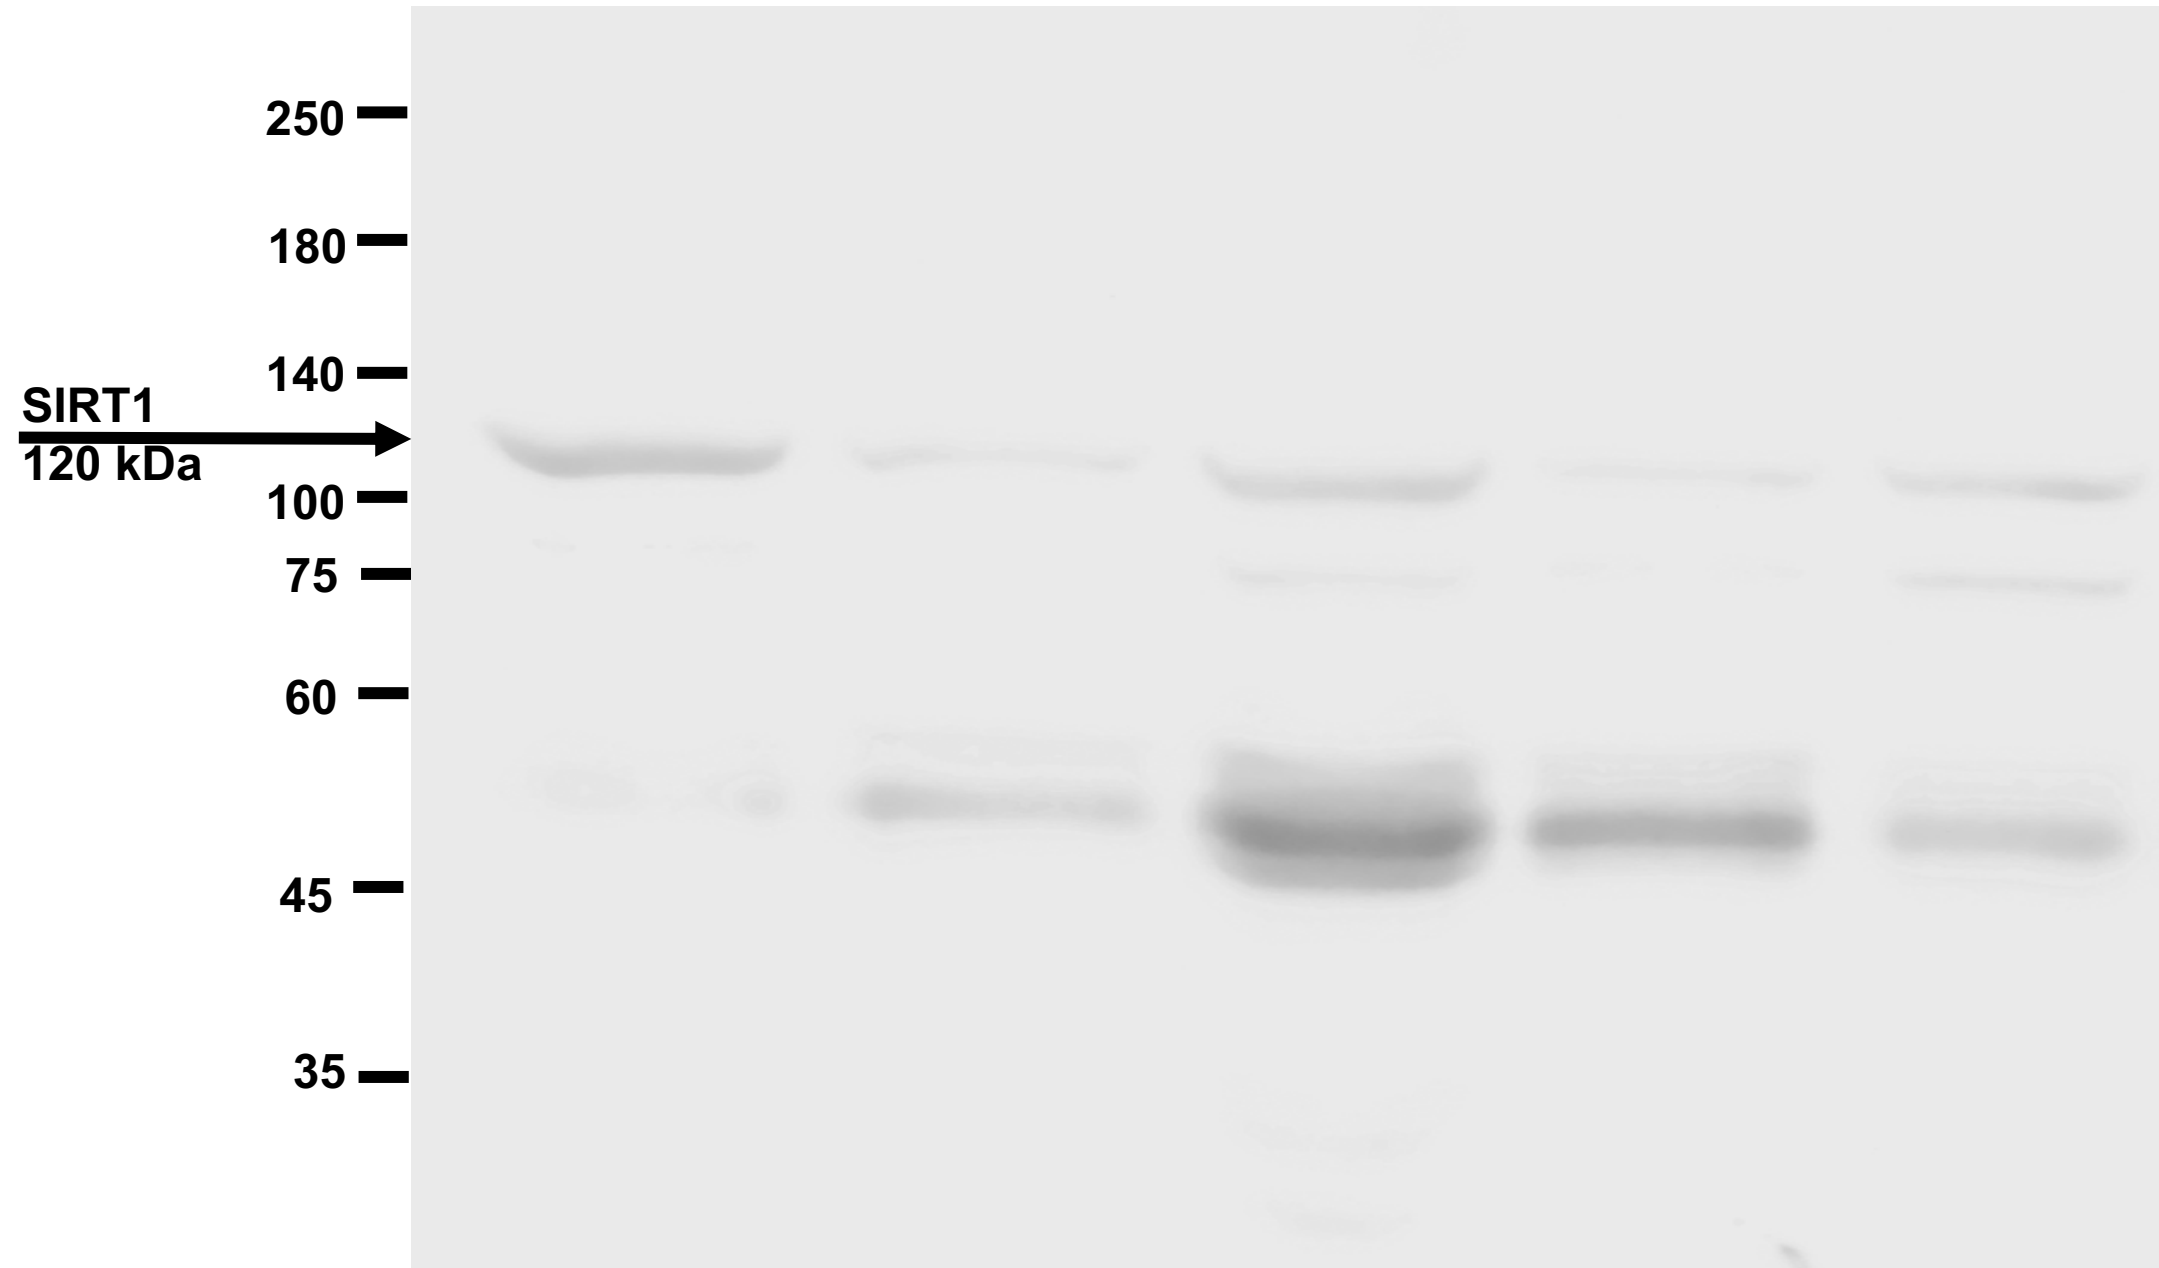

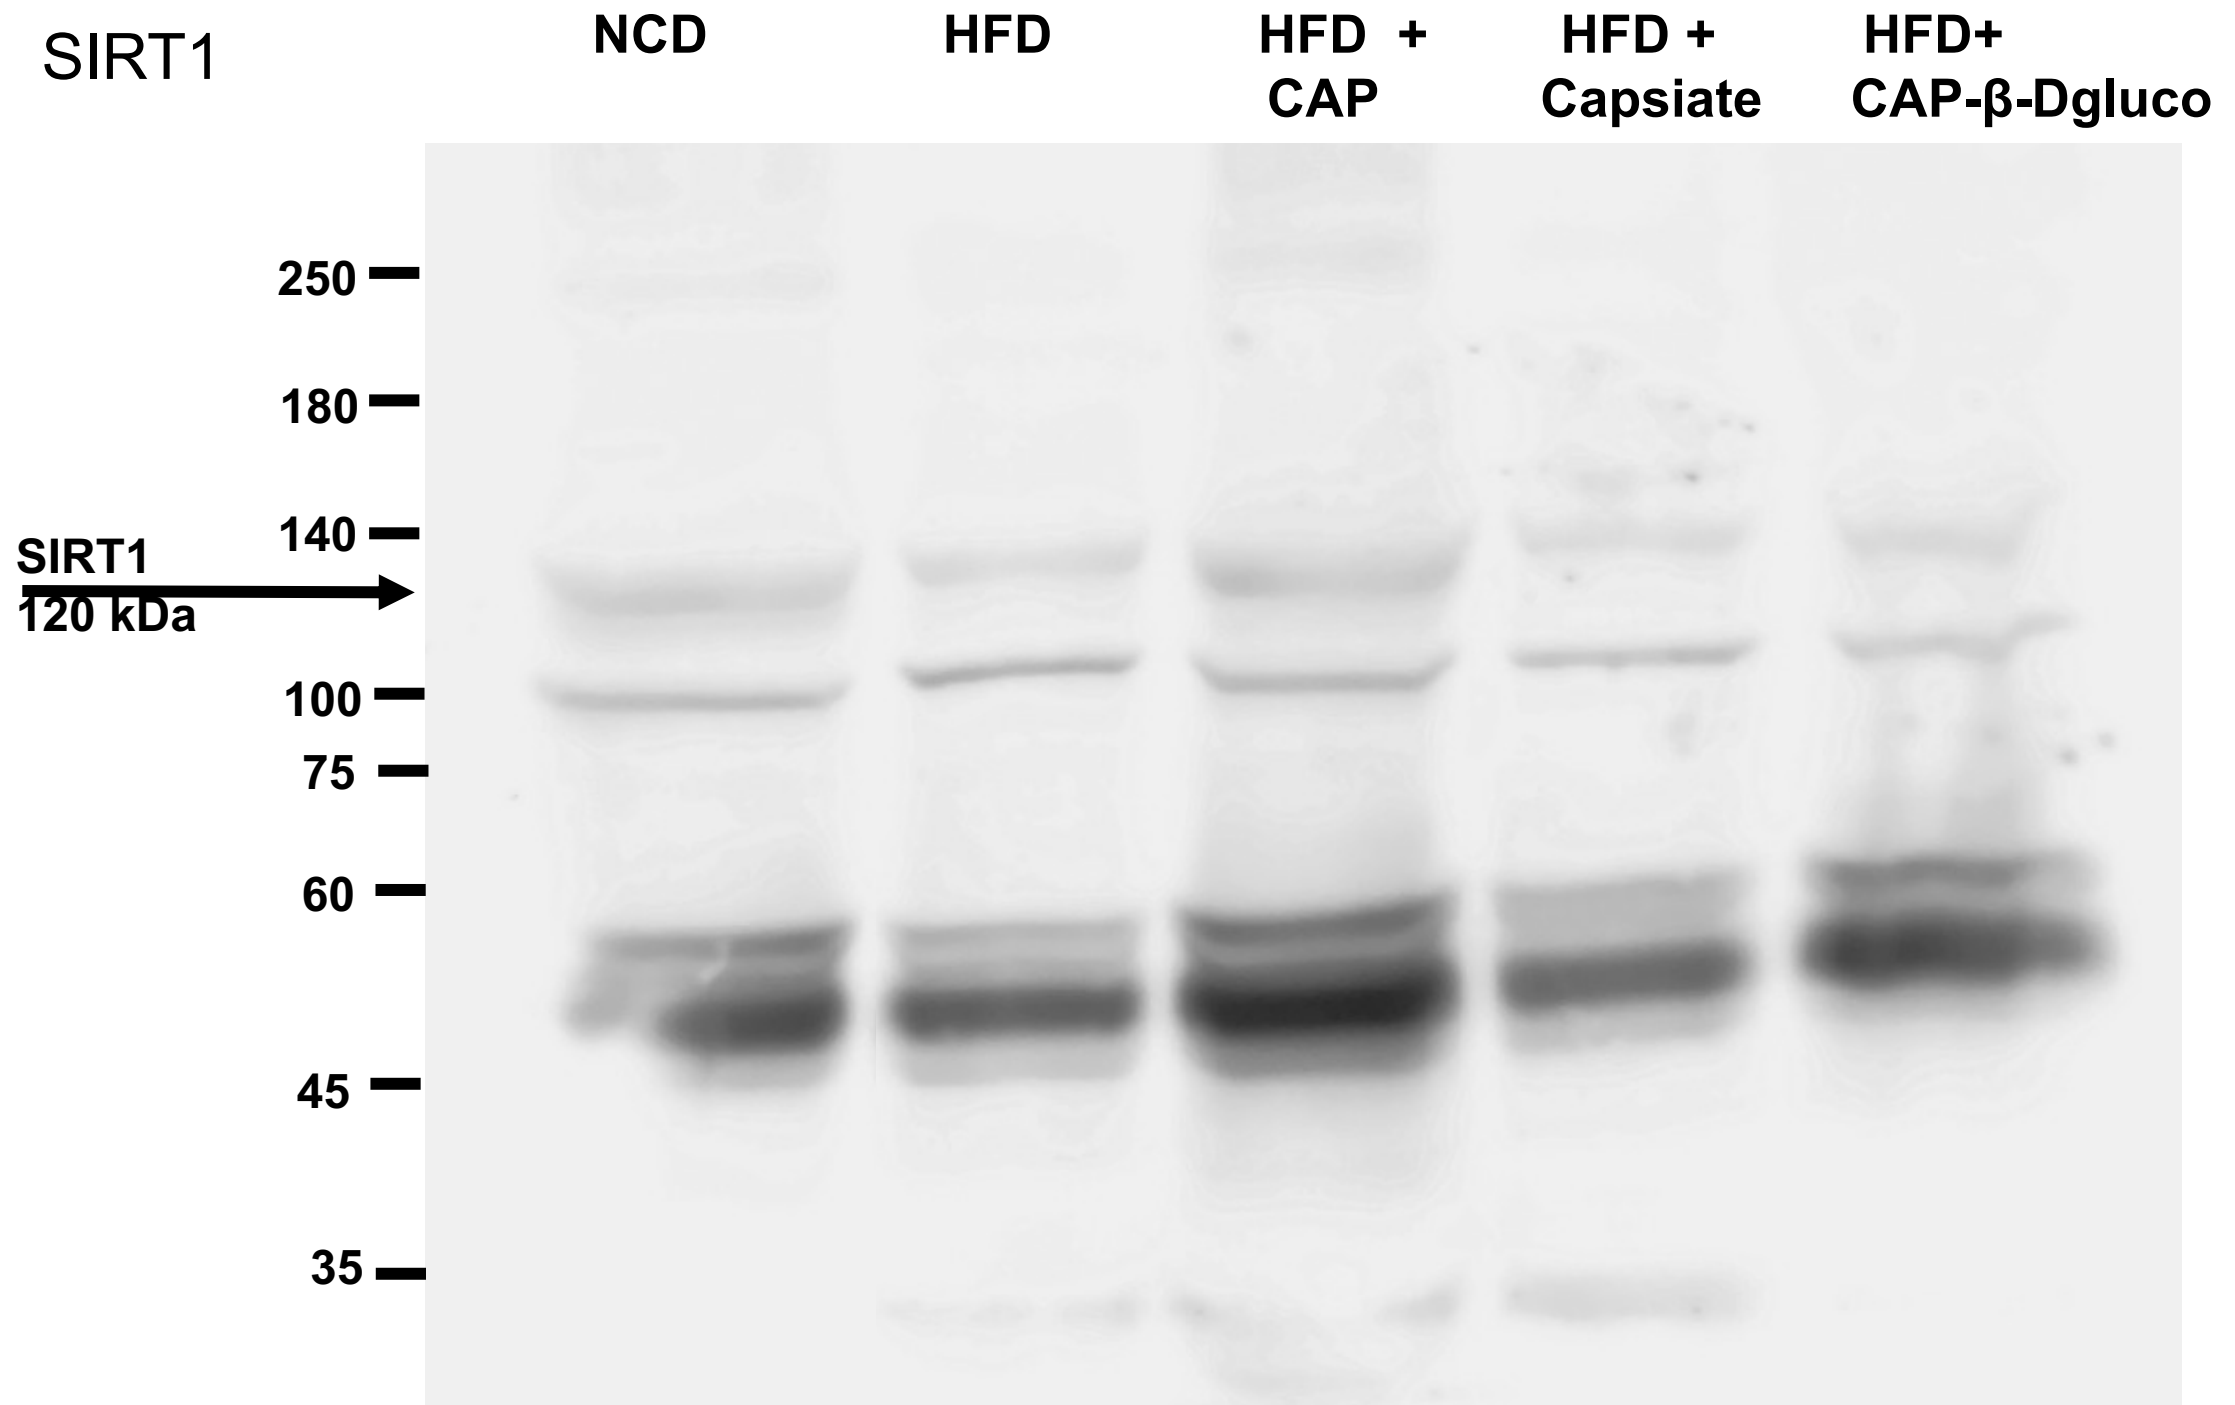

PRDM16

NCD

HFD

HFD +  
CAP

HFD +  
Capsiate

HFD+  
CAP-β-Dgluco

250

180

140

100

75

60

45

35

← **PRDM16**  
**140 kDa**

PRDM16

NCD

HFD

HFD +  
CAP

HFD +  
Capsiate

HFD+  
CAP- $\beta$ -Dgluco

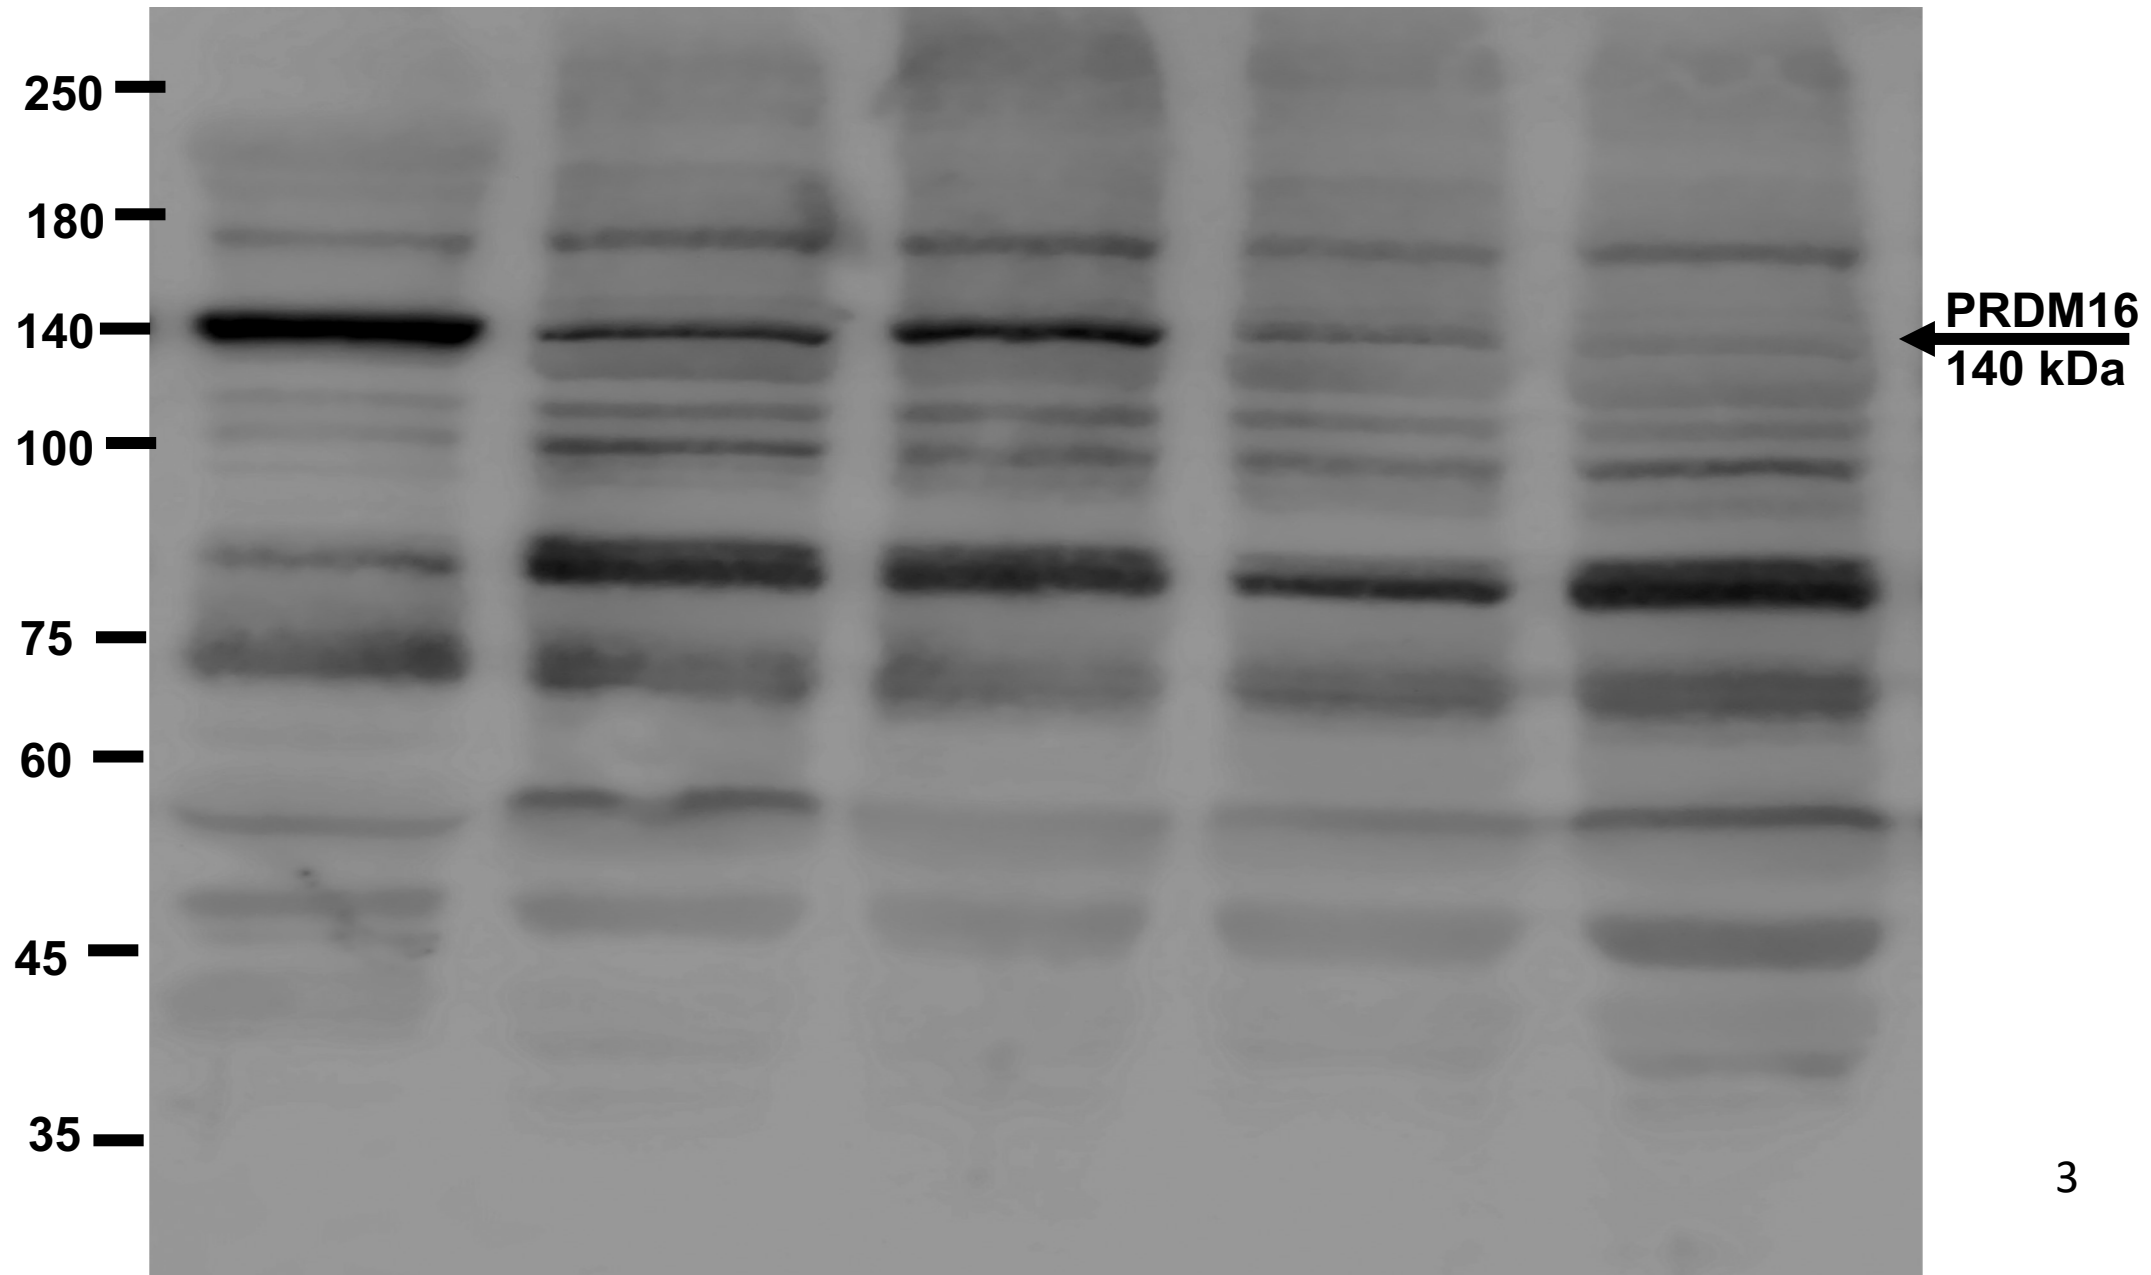

PGC1 $\alpha$

NCD

HFD

HFD +  
CAP

HFD +  
Capsiate

HFD+  
CAP- $\beta$ -Dgluco

180—  
140—  
100—  
75—  
60—  
45—

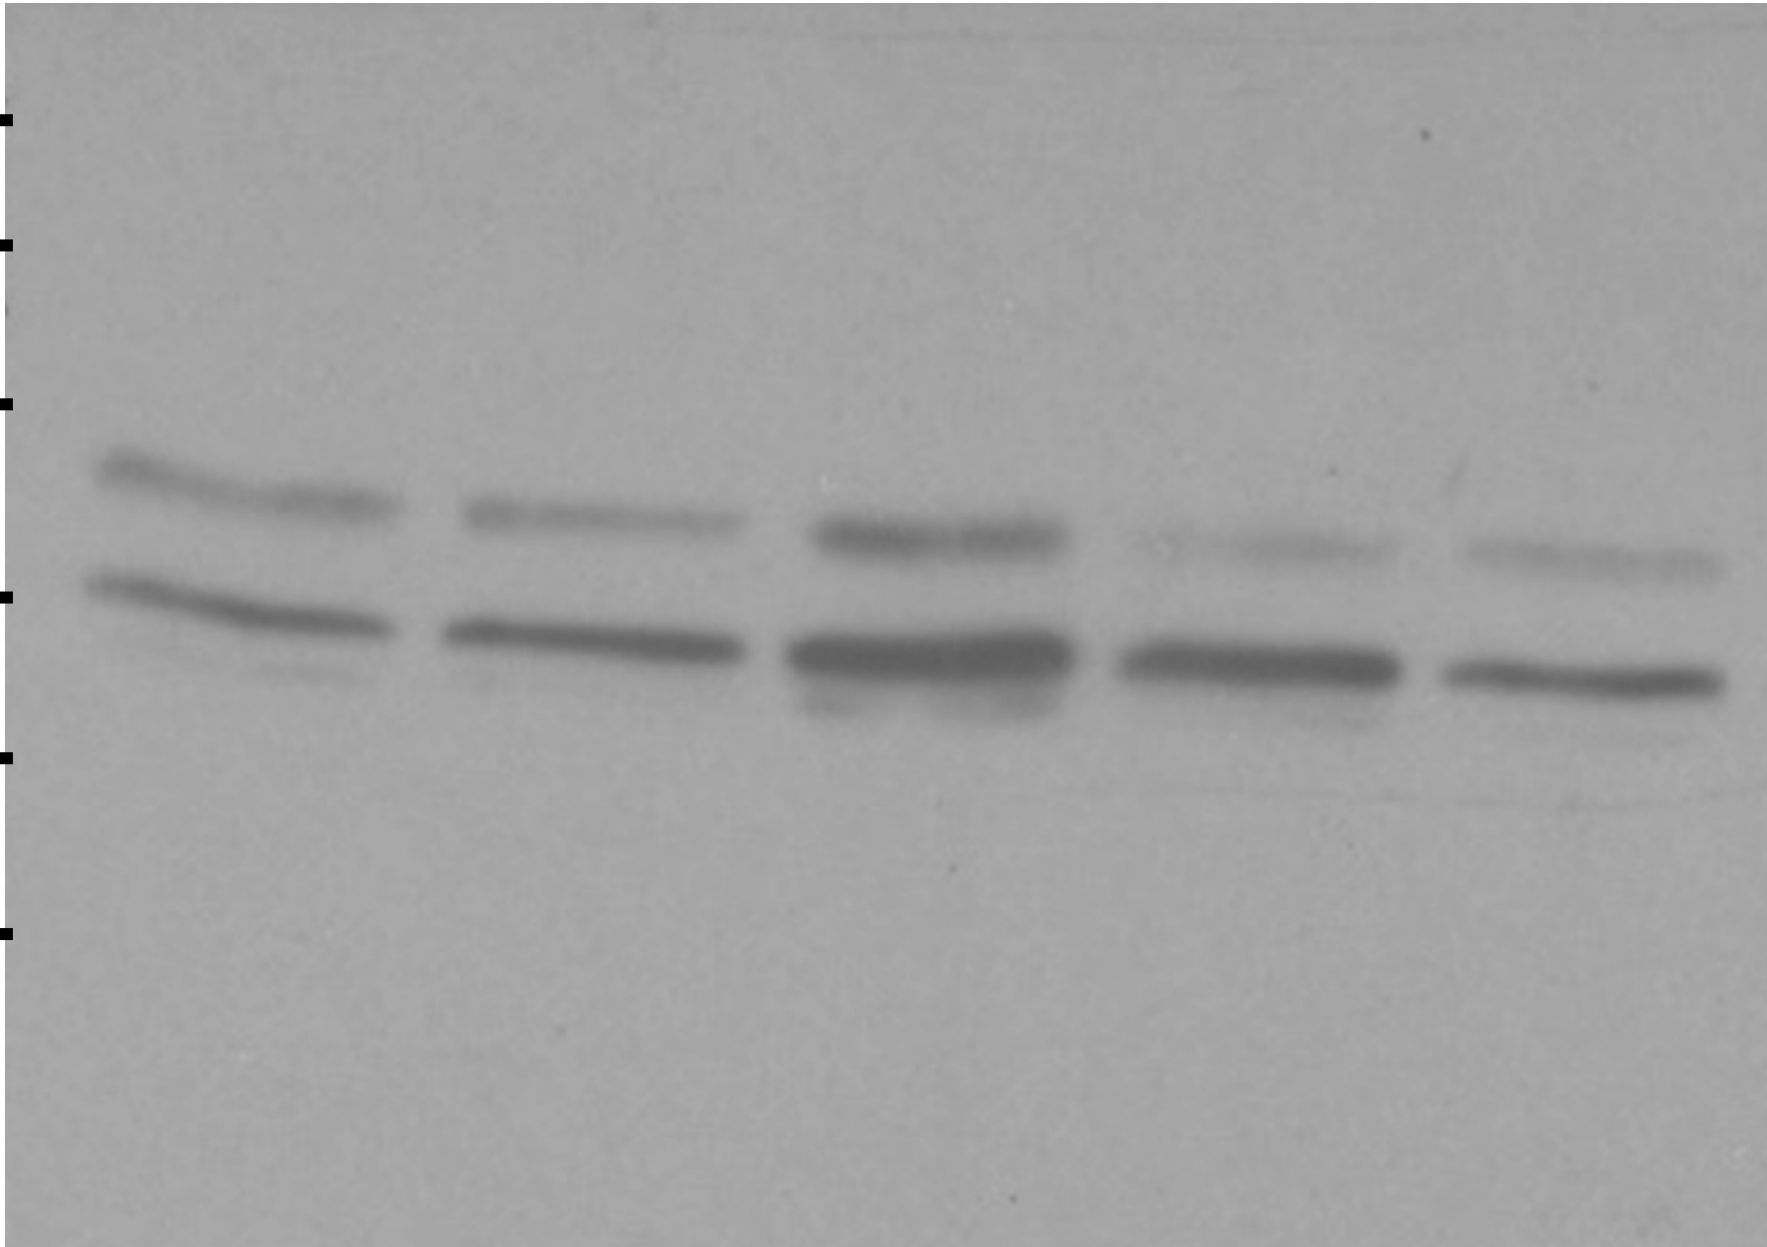

PGC1 $\alpha$   
92 kDa

PGC1 $\alpha$

NCD

HFD

HFD +  
CAP

HFD +  
Capsiate

HFD+  
CAP- $\beta$ -Dgluco

180

140

100

75

60

45

PGC1 $\alpha$

92 kDa

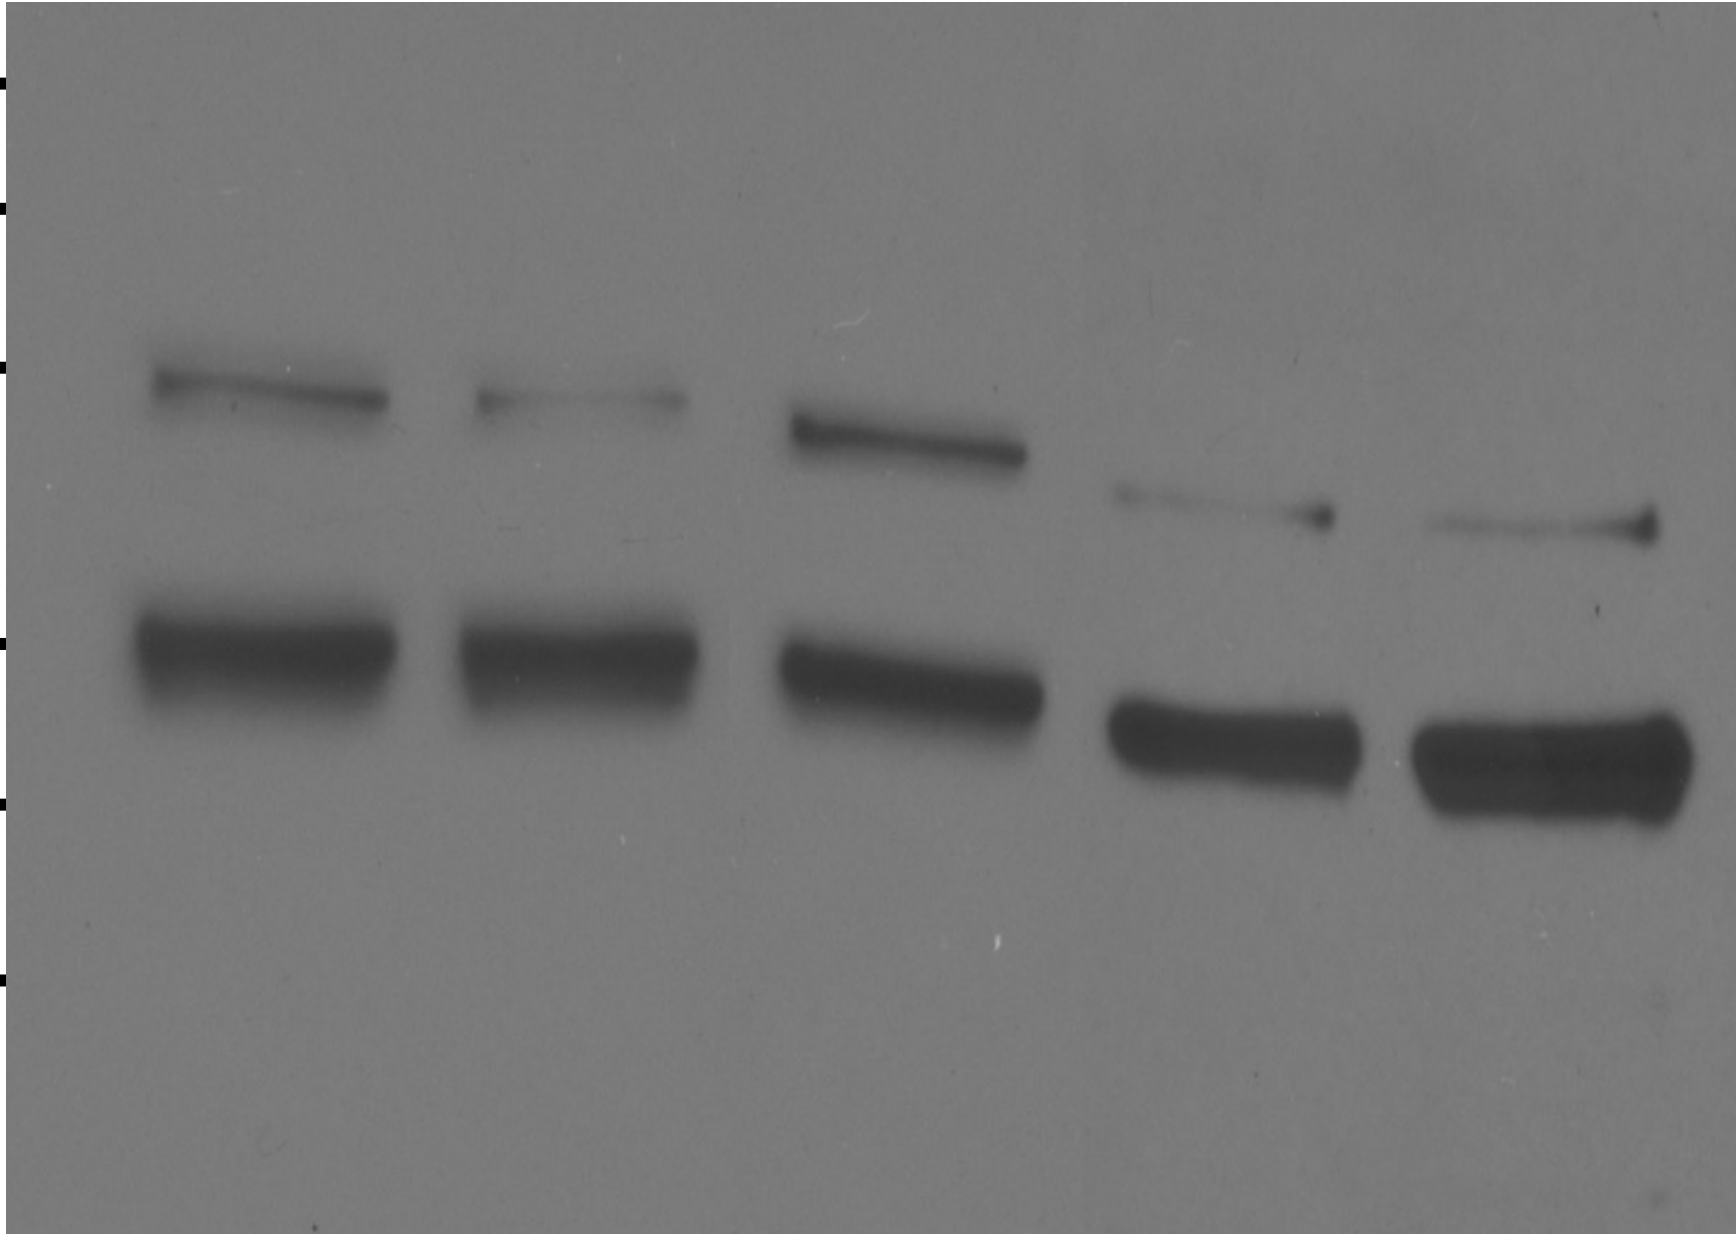

GAPDH

NCD

HFD

HFD +  
CAP

HFD +  
Capsiate

HFD+  
CAP-β-Dgluco

180 —  
140 —  
100 —  
75 —  
60 —  
45 —  
35 —  
25 —

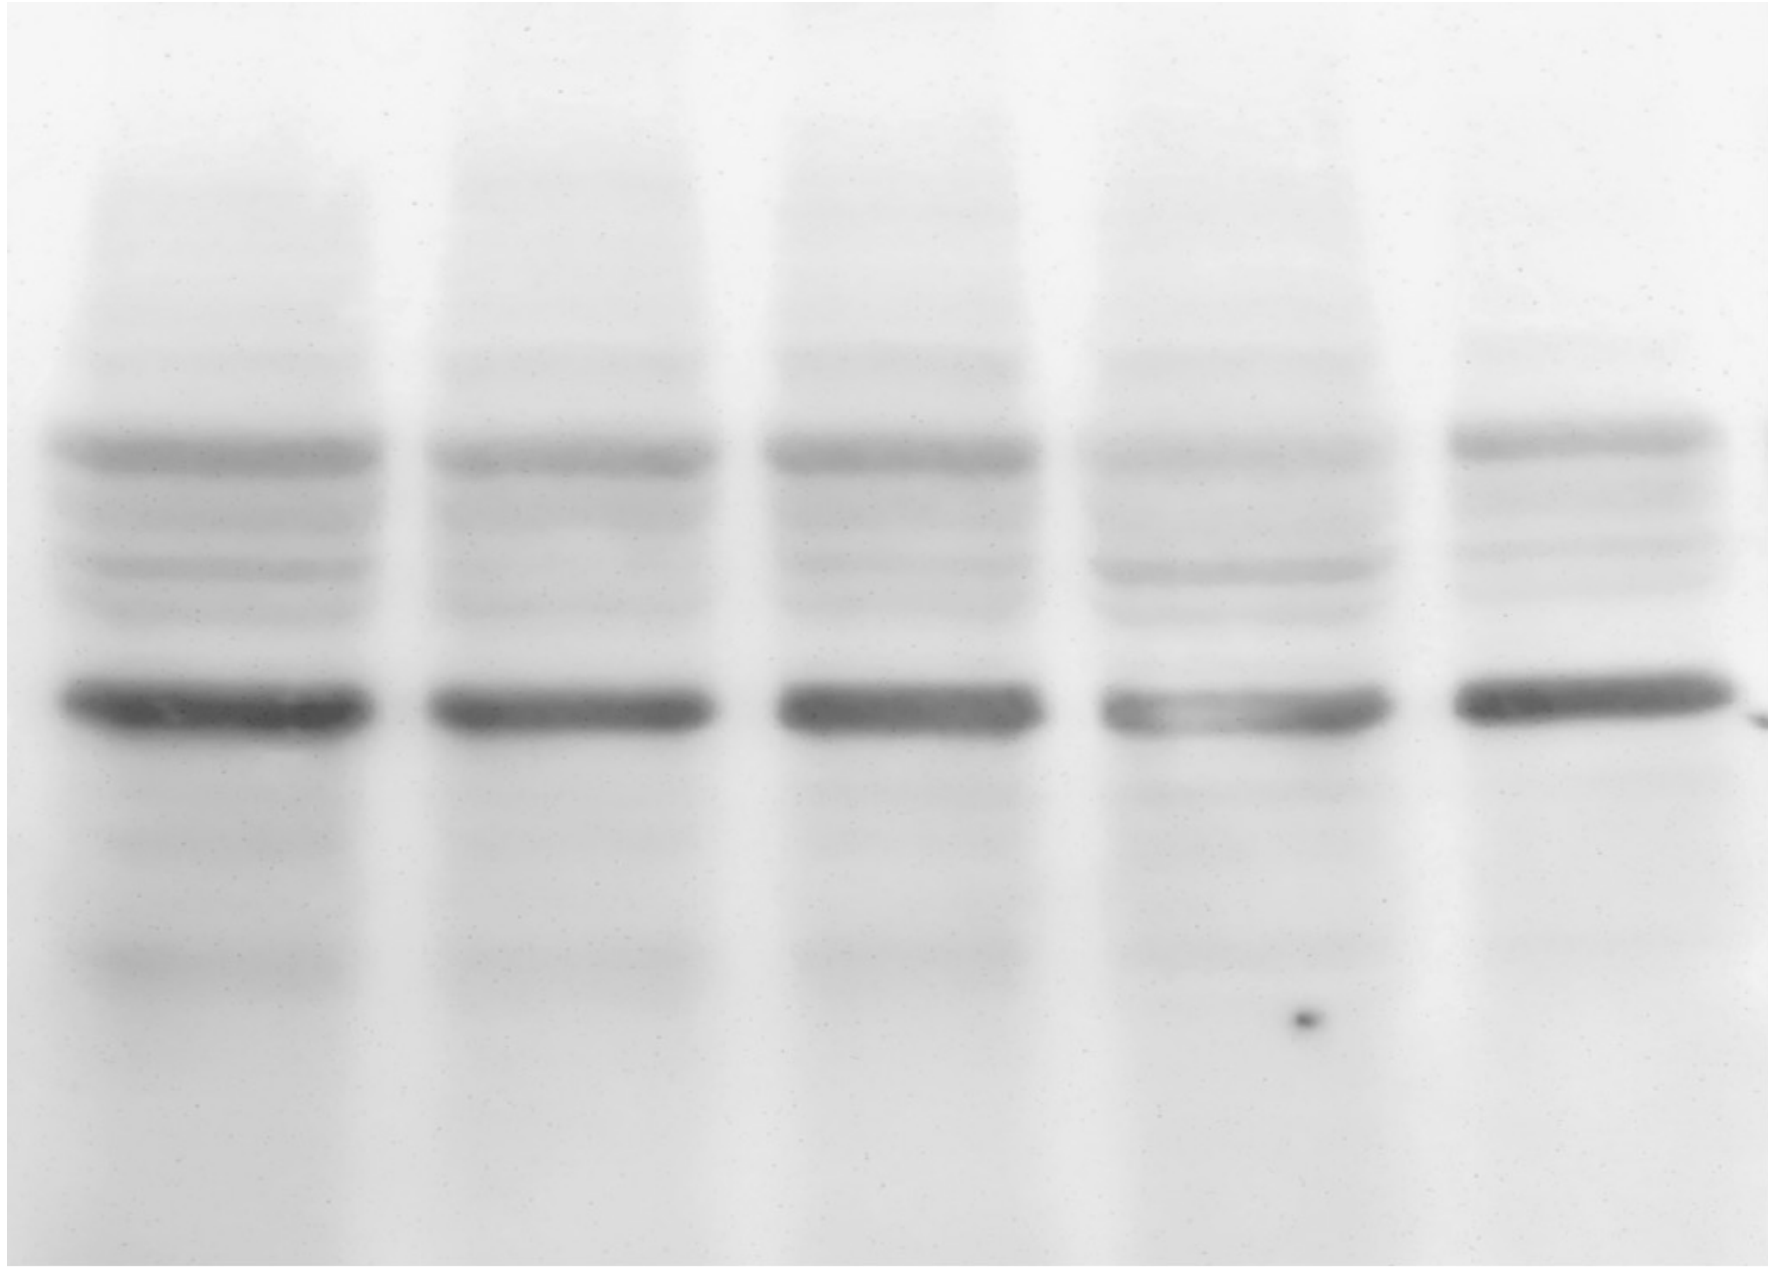

← GAPDH  
36 kDa

GAPDH

NCD

HFD

HFD +  
CAP

HFD +  
Capsiate

HFD+  
CAP- $\beta$ -Dgluco

180—  
140—  
100—  
75—  
60—  
45—  
35—  
25—

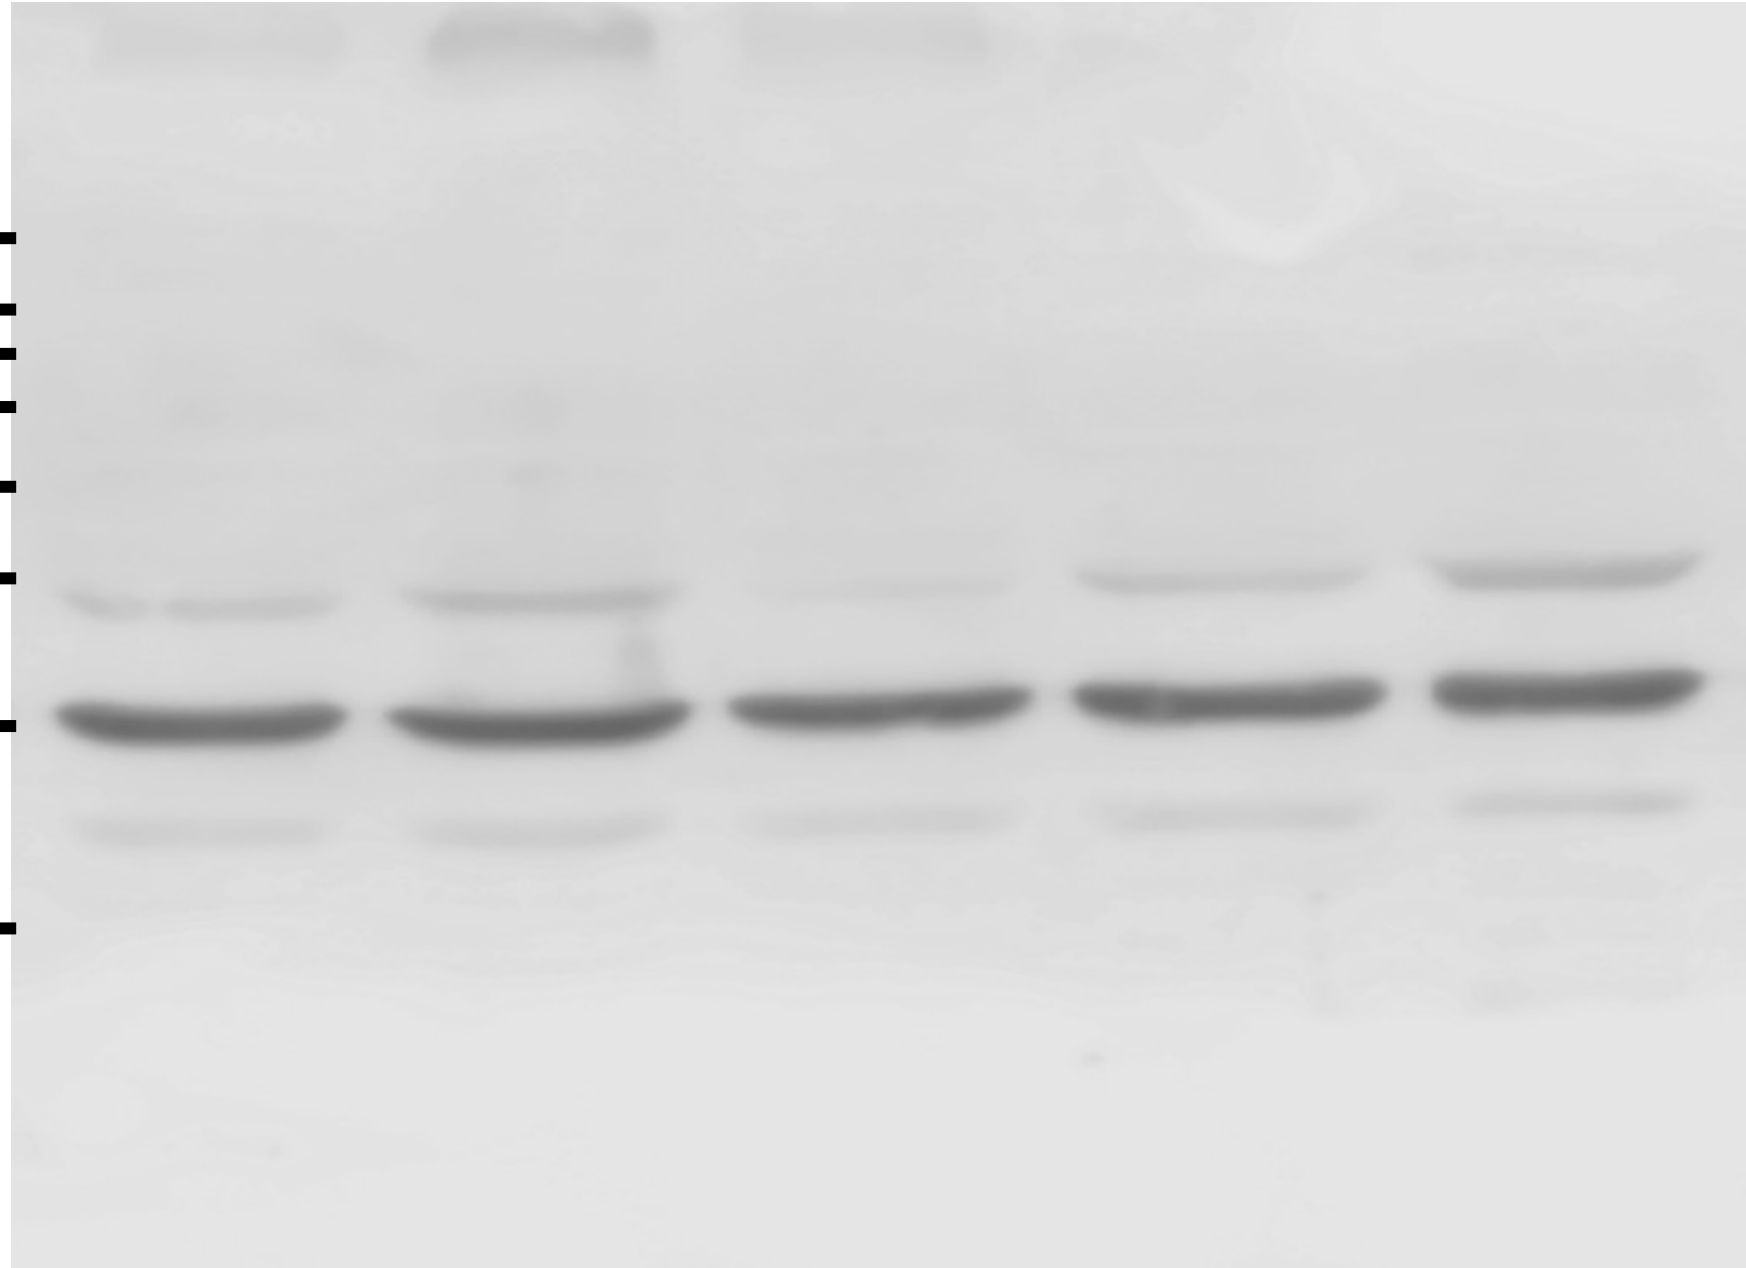

Supplement: s1 [file s1]
