# Supplementary figures and images for: Binding Efficacy and Thermogenic Efficiency of Pungent and Nonpungent Analogs of Capsaicin
Source: MDPI journal article supplement (doi:10.3390/molecules23123198), 2018-12-04

TRPV1

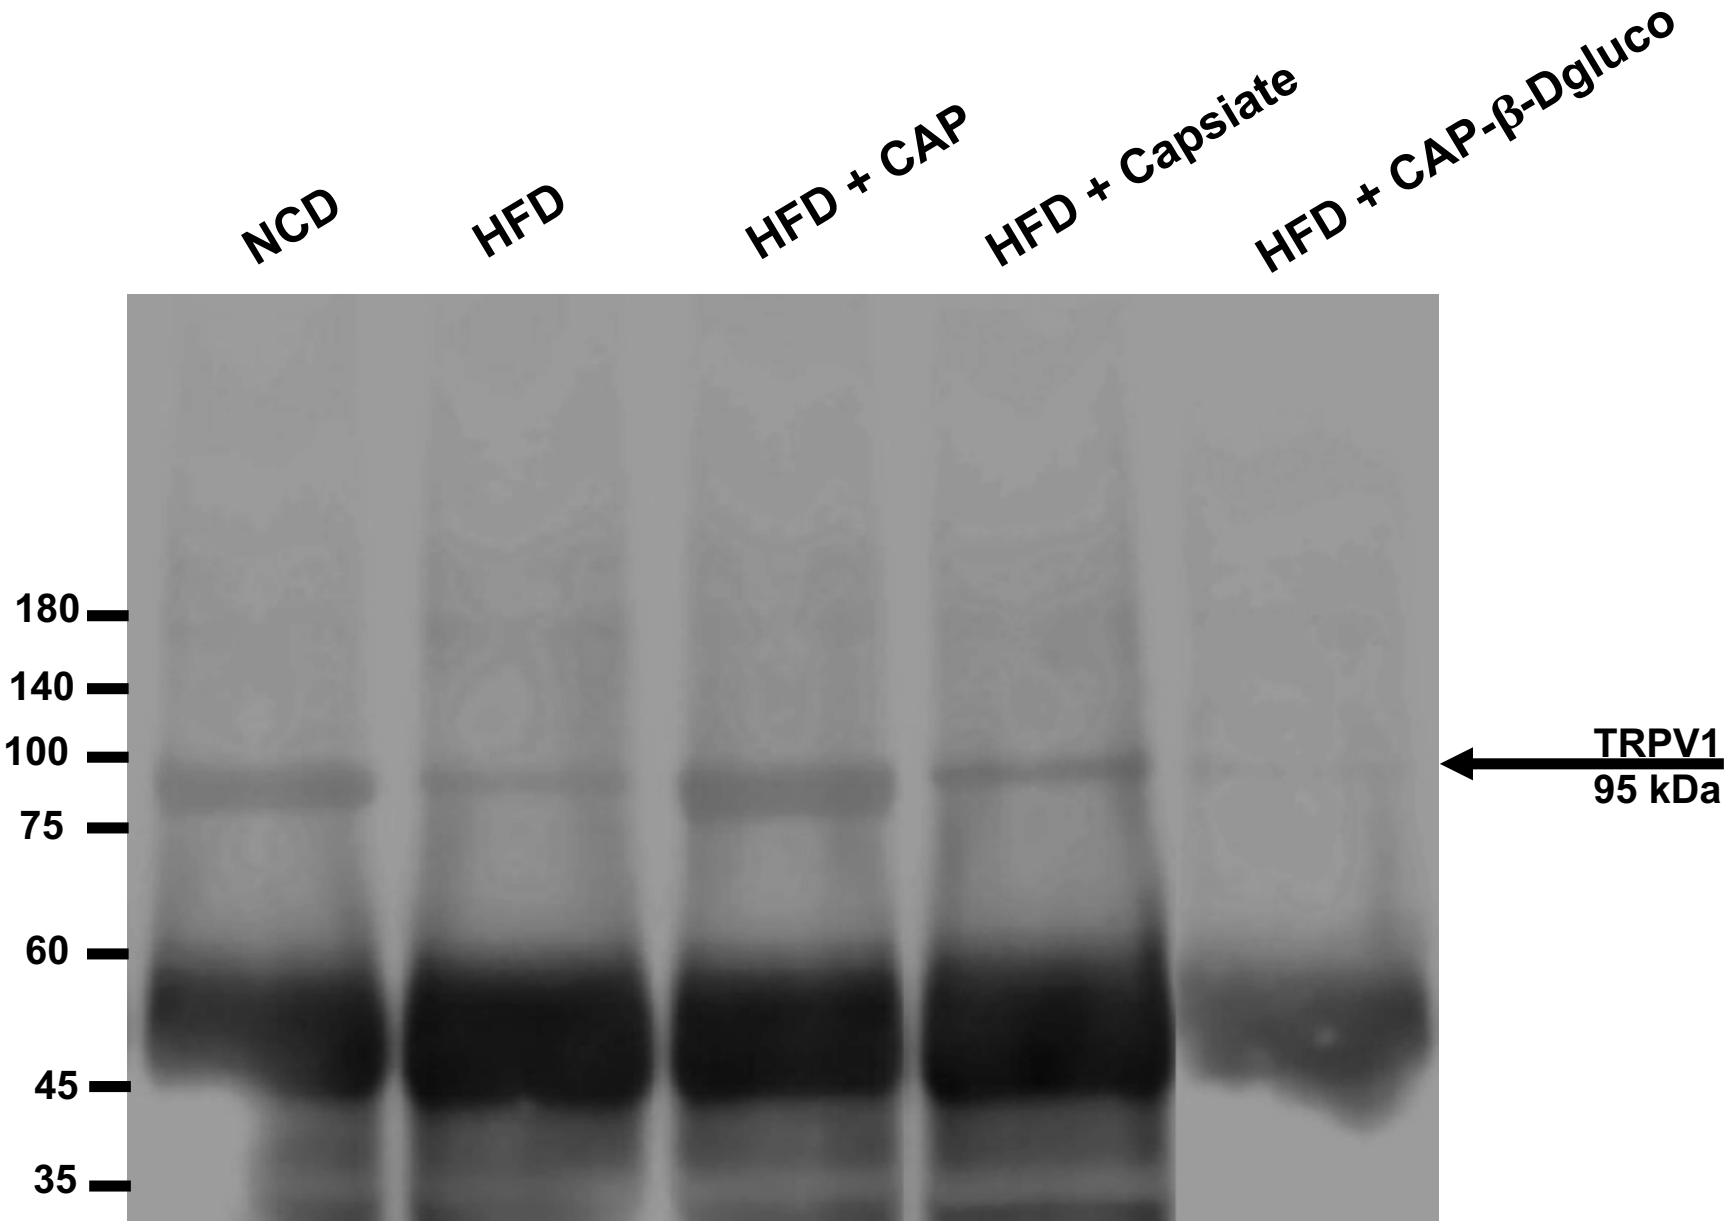

PPAR $\alpha$

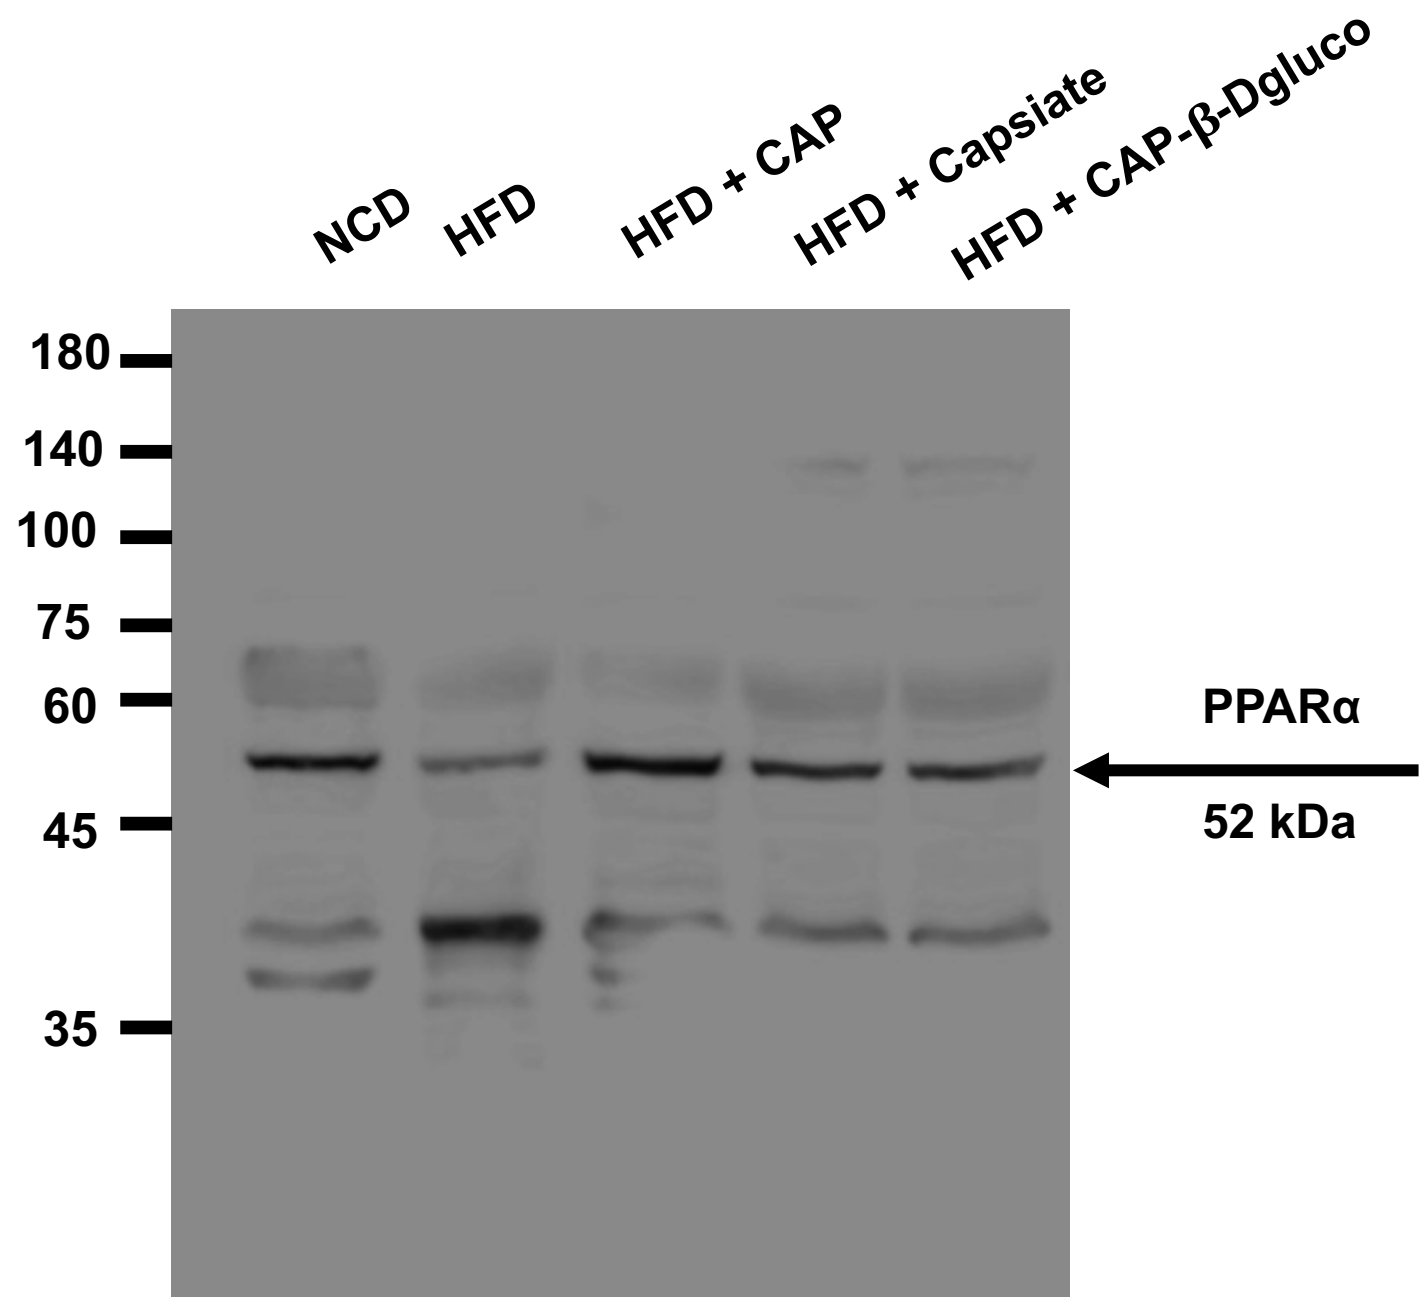

# BMP8b

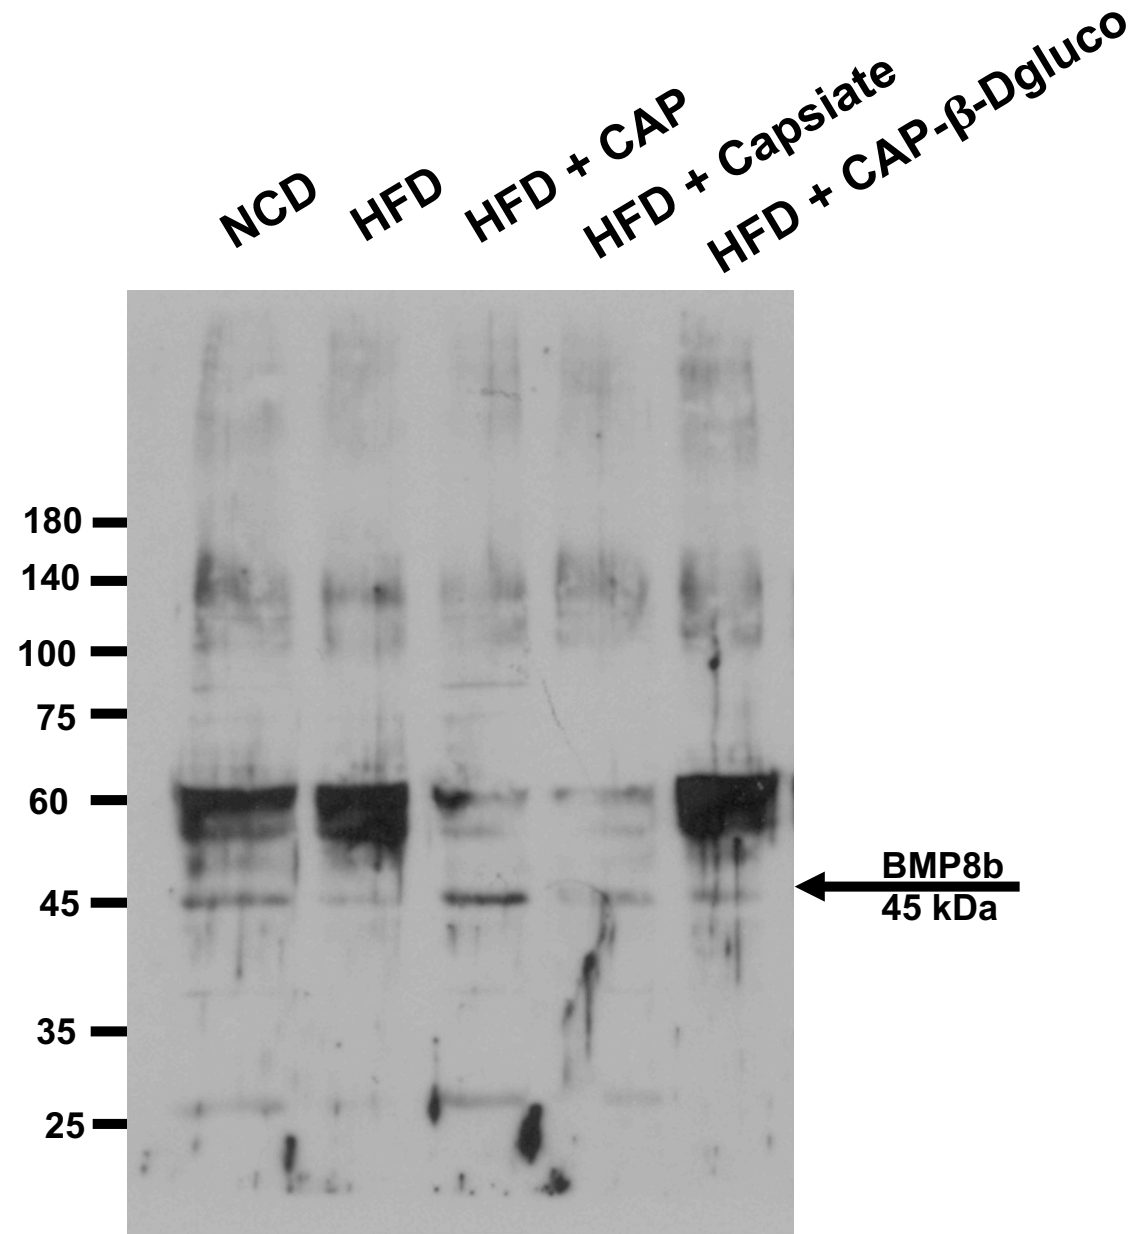

# UCP-1

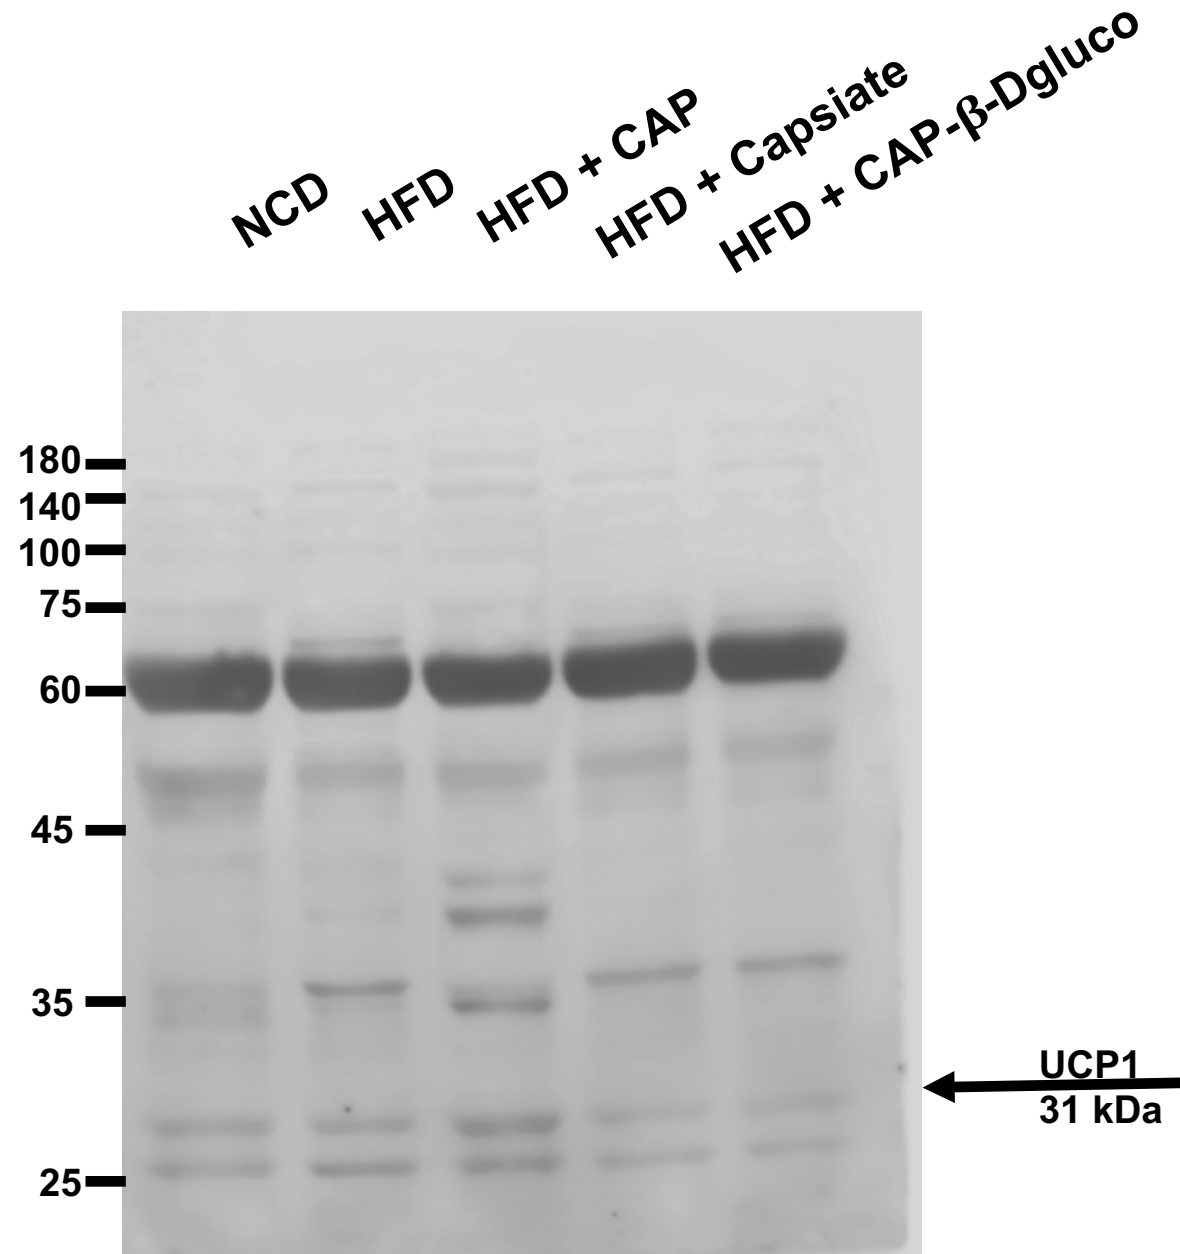

# SiRT-1

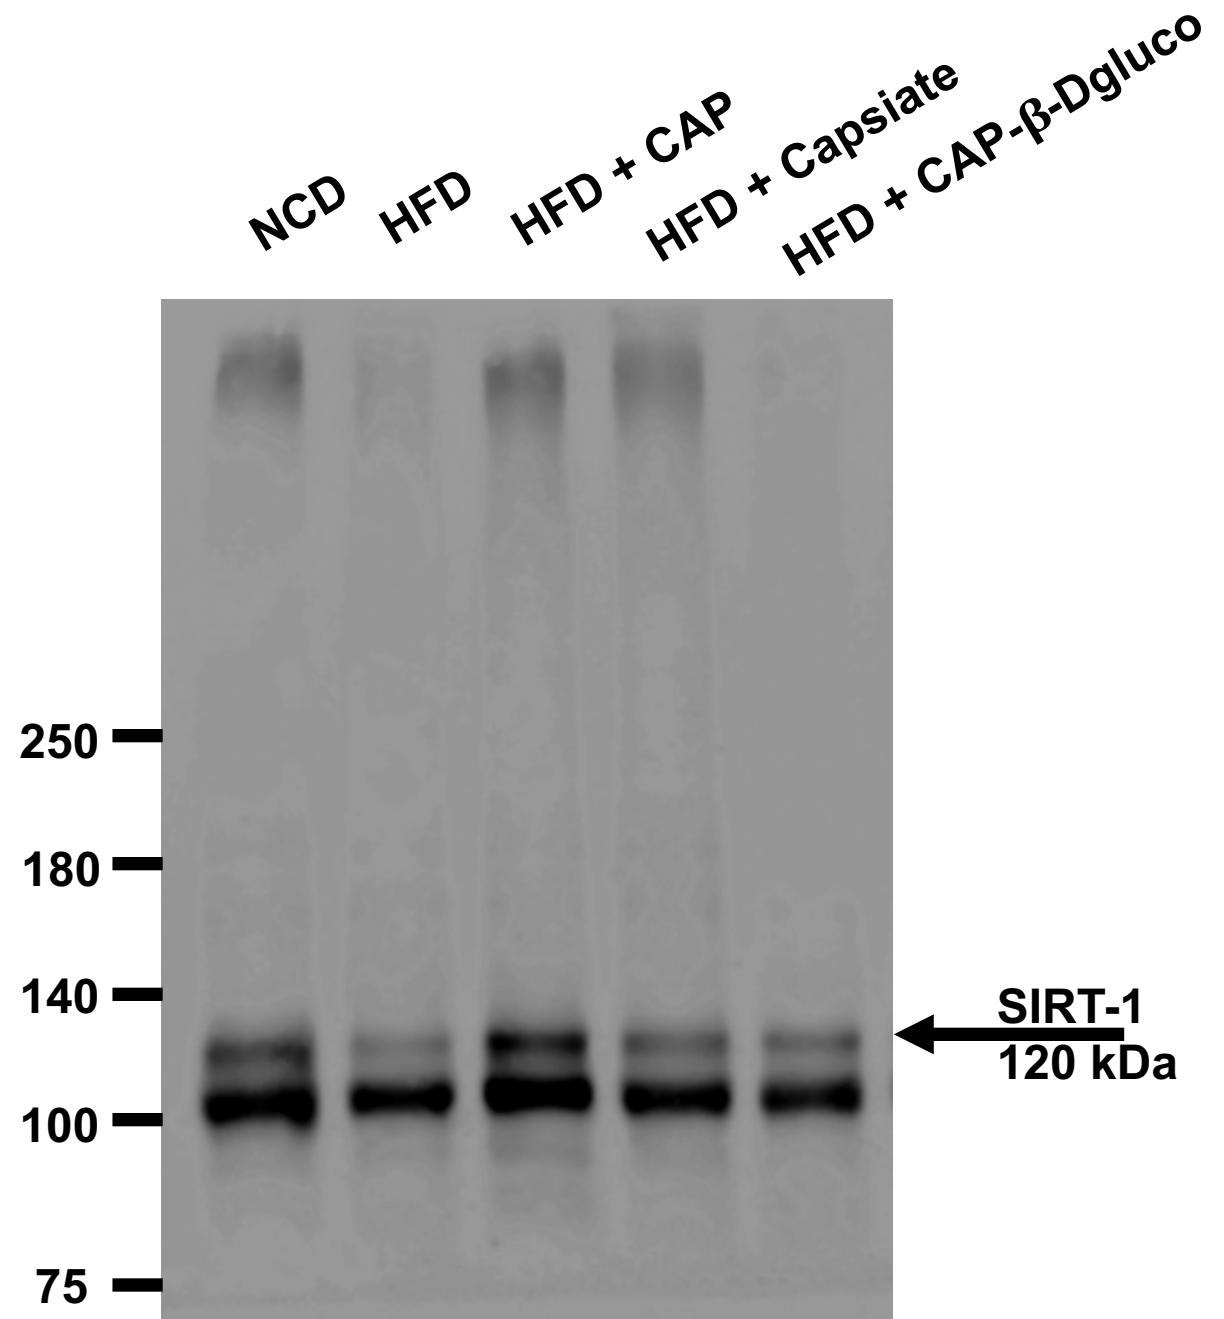

# PGC-1 $\alpha$

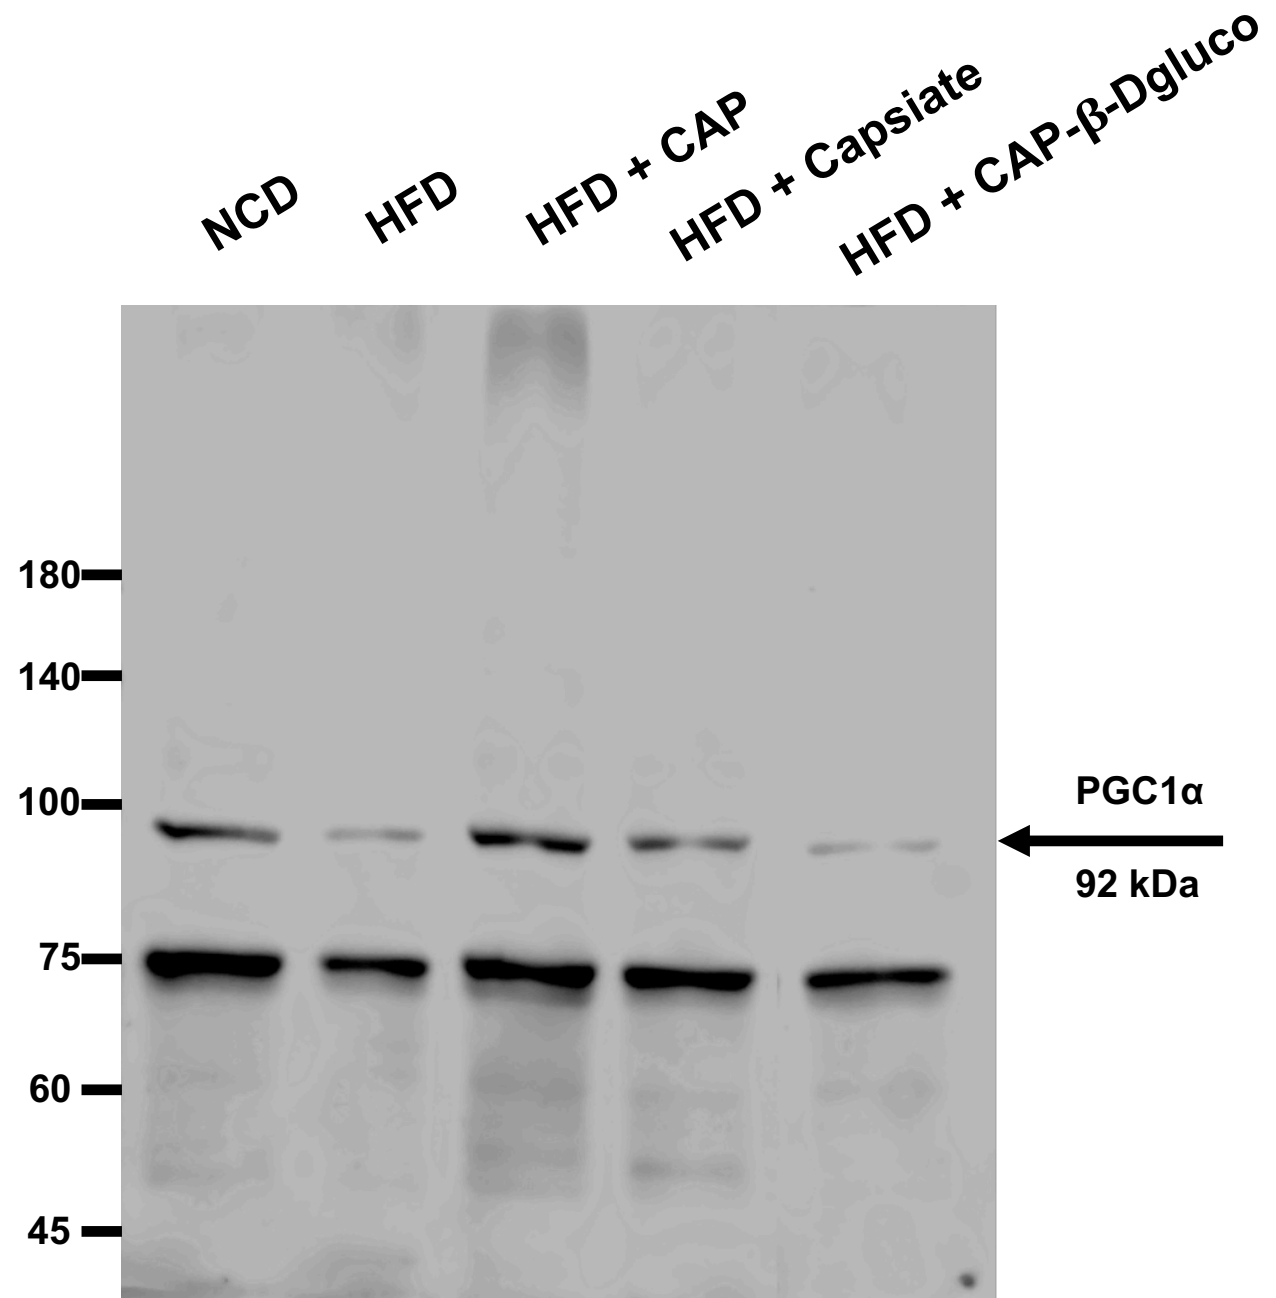

PRDM-16

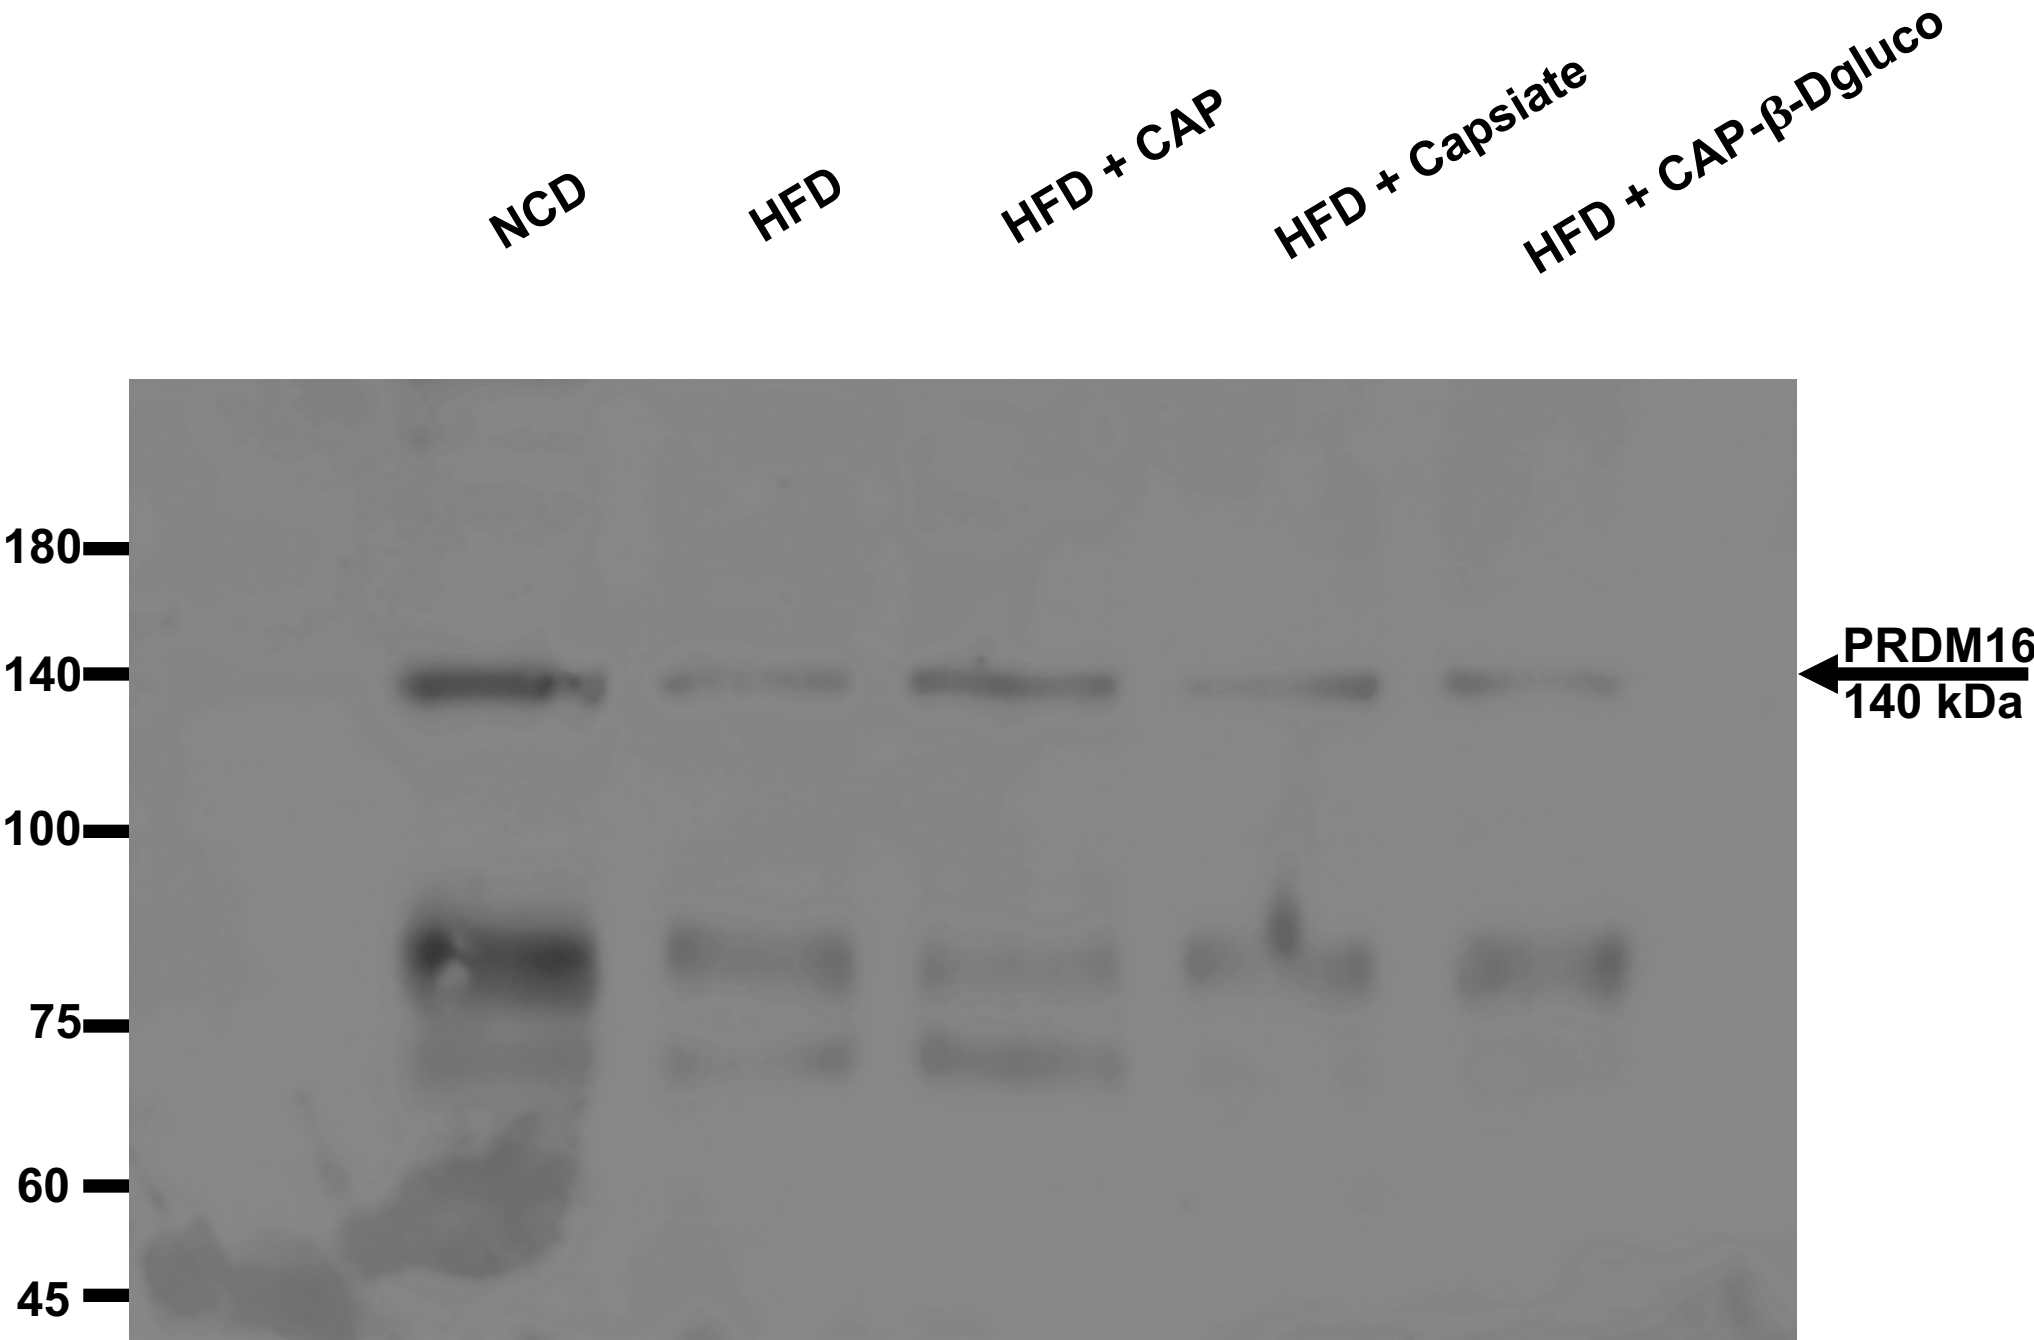

# GAPDH

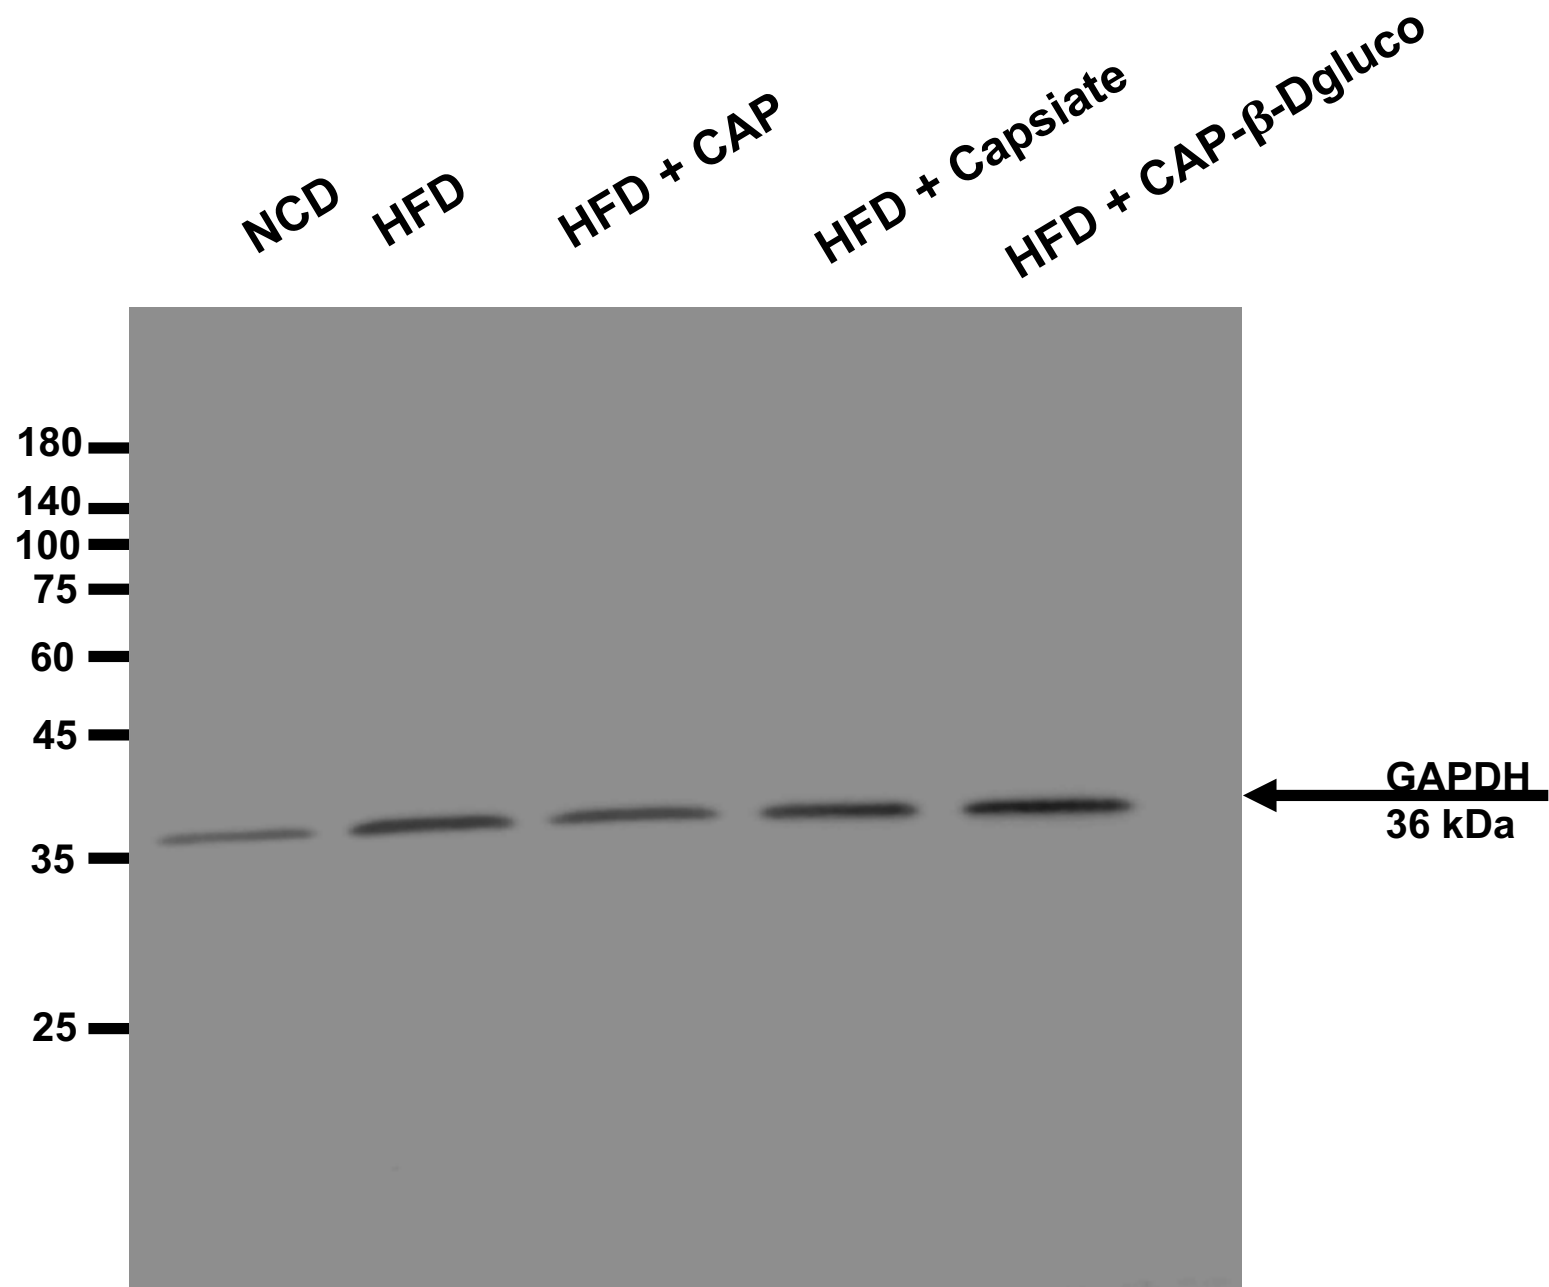

Supplement: s1 [file s1]
